# Supplementary material
Source: ML conference proceedings conference paper supplement (https://openreview.net/forum?id=2VX79YLT9s)
Supplement: supplementary_material [file combined.pdf › combined.pdf]

---

# Understanding Outer Learning Rates in Local SGD

---

Anonymous Author(s)

Affiliation

Address

email

## Abstract

1 Modern machine learning often requires training with large batch size, distributed  
2 data, and massively parallel compute hardware (like mobile and other edge devices  
3 or distributed data centers). Communication becomes a major bottleneck in such  
4 settings but methods like Local Stochastic Gradient Descent (Local SGD) show  
5 great promise to reduce the global communication need. Local SGD consists of  
6 three parts: a local optimization processes, an aggregation mechanism, and an  
7 outer optimizer that uses the aggregated updates from the nodes to produce a new  
8 model. While there exists an extensive literature on understanding the impact of  
9 hyperparameters in the local optimization process, the choice of outer optimizer  
10 and its hyperparameters is less clear. We study the role of the outer learning in  
11 Local SGD, and prove new convergence guarantees for the algorithm. In particular,  
12 we show that tuning the outer learning rate allows us to (a) trade off between  
13 optimization error and stochastic gradient noise variance, and (b) make up for  
14 ill-tuning of the inner learning rate. Our theory suggests that the outer learning rate  
15 should sometimes be set to values greater than 1. We extend our results to apply to  
16 when we use momentum in the outer optimizer, and also introduce a novel data-  
17 dependent analysis of Local SGD that yields further insights on outer learning rate  
18 tuning. We conduct comprehensive experiments with standard language models  
19 and various outer optimizers to validate our theory.

## 20 1 Introduction

21 Training very large scale machine learning models requires a lot of compute. This compute is  
22 often centrally controlled by a single entity and tightly connected in a data center. Gradients are  
23 constantly synchronized, hardware failures are controlled and mitigated, and things (mostly) run  
24 smoothly. Building this training infrastructure is expensive, however, and centralized control might  
25 not be desirable for all models. This has led to a surge of interest in decentralized collaborative  
26 training of large-scale models across different, potentially poorly connected clusters (Douillard,  
27 Feng, Rusu, Chhaparia, et al., 2023; Jaghouar, Ong, and Hagemann, 2024; Jaghouar, Ong, Basra,  
28 et al., 2024). This has motivated the adoption of federated learning algorithms in training language  
29 models, chiefly for scalability and communication efficiency rather than data privacy. Efficient  
30 parallelization strategies also factored in the remarkable recent training of DeepSeek V3 and R1 on a  
31 tight budget (Liu, Feng, et al., 2024; Guo et al., 2025).

32 A foundational algorithm in distributed and federated optimization is Local SGD (Wang, Charles,  
33 et al., 2021). Many popular algorithms fit in the FedOpt template (Reddi et al., 2021) (Algorithm 1),  
34 including FedAdam (Reddi et al., 2021), FedRR (Mishchenko, Khaled, and Richtárik, 2022; Mali-  
35 novsky and Richtárik, 2022), DiLoCo (Douillard, Feng, Rusu, Chhaparia, et al., 2023; Jaghouar, Ong,  
36 and Hagemann, 2024) and many others. FedOpt solves the minimization problem  $\min_{x \in \mathbb{R}^d} f(x)$   
37 given access to  $M$  different computational nodes and unbiased stochastic gradients of  $f$ . FedOpt  
38 consists of three main components: an inner update loop on every client, an aggregation of the client  
39 updates, and then an outer update step taken on the server.

---

**Algorithm 1** The FedOpt Algorithmic Template

---

```
1: Input. Update rules LocalUpdate and OuterUpdate. Initial point  $x_0$ .
2: for communication rounds  $r = 0, 1, \dots, R - 1$  do
3:   Broadcast  $x_r$  to each node  $m$ 
4:   for each node  $m$  in parallel do
5:     Set  $y_{m,r,0} = x_r$ .
6:     for local steps  $h = 0, 1, \dots, H - 1$  do
7:       Set  $y_{m,r,h+1} = \text{LocalUpdate}(y_{m,r,h}, g_{m,r,h})$  for stochastic gradient  $g_{m,r,h}$  at  $y_{m,r,h}$ .
8:     end for
9:     Communicate  $y_{m,r,H}$  to the server.
10:  end for
11:  Compute the update or “outer gradient”  $\hat{\Delta}_{r,H} = \frac{1}{M} \sum_{m=1}^M (y_{m,r,H} - x_r)$ .
12:  Update  $x_{r+1} = \text{OuterUpdate}(x_r, -\hat{\Delta}_{r,H})$ .
13: end for
```

---

40 When both the local and outer update rules correspond to gradient descent (i.e.  $x_{\text{new}} = x_{\text{old}} - \beta \Delta$   
41 for some stepsize  $\beta$  and update vector  $\Delta$ ), the corresponding algorithm is Generalized Local SGD.  
42 If we additionally take the outer stepsize to be 1, we get Local SGD. Local SGD simply does  $H$   
43 steps of SGD on each node, and then averages the result after applying the updates. This is the most  
44 common form in which the algorithm is analyzed, as in e.g. (Stich, 2019; Khaled, Mishchenko, and  
45 Richtárik, 2020; Woodworth, Patel, Stich, et al., 2020; Koloskova et al., 2020; Glasgow, Yuan, and  
46 Ma, 2022; Patel, Glasgow, Zindari, et al., 2024). In practice, different choices of outer optimizers  
47 perform better. For example, DiLoCo/OpenDiLoCo use SGD with Nesterov Momentum as the  
48 outer optimizer (Douillard, Feng, Rusu, Chhaparia, et al., 2023). This has motivated much analysis  
49 of different outer optimizers and their impact (Reddi et al., 2021; Malinovsky, Mishchenko, and  
50 Richtárik, 2022; Jhunjunwala, Wang, and Joshi, 2023; Sun et al., 2023). However, our theoretical  
51 understanding of the fundamental Generalized Local SGD algorithm remains limited. In particular, it  
52 is not clear why the bilevel optimization structure of the algorithm is helpful from an optimization  
53 perspective, even in the i.i.d. setting where the data distribution is the same on all the nodes.  
54 Additionally and to the best of our knowledge, we have no explicit expressions for what the ideal  
55 learning rate pair  $(\eta, \gamma)$  should be.

56 **Contributions.** Our papers makes the following contributions.

- 57 • We conduct a novel, tighter analysis of Generalized Local SGD (Theorem 3.3) that shows the  
58 outer learning rate plays a dual role. It (a) interpolates between two extreme regimes: taking  
59 many effective steps at the cost of higher variance to taking fewer steps but at reduced variance  
60 and (b) increases the algorithmic robustness to hyperparameter tuning by making up for ill-tuned  
61 inner learning rates. The latter holds even in the absence of any stochastic gradient noise.
- 62 • We extend the above analysis to cover Generalized Local SGD where the outer optimizer also  
63 uses momentum (Theorem 3.5) and show that this gives additional leeway in tuning  $\gamma$ .
- 64 • We also derive an adaptive, data-dependent, high-probability guarantee for the convergence of  
65 the algorithm (Theorem 3.6) that shows further benefits of tuning the outer stepsize in more  
66 nuanced settings.
- 67 • We additionally conduct an extensive empirical analysis for training large-scale language models  
68 with various outer optimizers (gradient descent, accelerated gradient descent, and Schedule-Free  
69 gradient descent).

70 We now review related work, then proceed to our main results.

## 71 2 Related Work

72 There is a rich literature on algorithms for communication-efficient distributed optimization for  
73 *federated learning* (Konečný et al., 2016), where multiple clients collaborate on solving a machine  
74 learning problem (Wang, Charles, et al., 2021). Federated learning algorithms are designed to reduce  
75 the effect of data heterogeneity (Karimireddy et al., 2020; Wang, Charles, et al., 2021; Murata and  
76 Suzuki, 2021), ensure the data stays private (Wei et al., 2020), deal with intermittent or cyclic client  
77 availability (Eichner et al., 2019), among other issues.

As models have grown larger in size over the past few years, going from a few million parameters to billions (Brown et al., 2020), the scale of training runs has also grown to include many more devices divided across multiple computing clusters rather than a single cluster (Diskin et al., 2021; Huang, Huang, and Liu, 2022; Borzunov et al., 2022; Douillard, Feng, Rusu, Chhaparia, et al., 2023). Even within a single datacenter, training runs now involve tens of thousands of GPUs (Jiang et al., 2024). This has motivated researchers to develop and use algorithms inspired by the federated learning setting for large-scale training instead. Examples of such algorithms include DiLoCo (Douillard, Feng, Rusu, Chhaparia, et al., 2023), its open cousin OpenDiLoCo (Jaghoul, Ong, and Hagemann, 2024), DiPaCo (Douillard, Feng, Rusu, Kuncoro, et al., 2024), and others (Liu, Chhaparia, et al., 2024; Liang et al., 2024; Liu, Feng, et al., 2024). Federated learning methods thus have found use in pretraining and fine-tuning language models (Jaghoul, Ong, and Hagemann, 2024; Yang et al., 2024), and may prove particularly important for scaling even larger models in the future (Iacob et al., 2024; Sani et al., 2024; Rush et al., 2024). We note that the use of methods for federated learning even for i.i.d. distributed training is not new, and is perhaps being “re-discovered” as training runs grow too large to fit on single clusters. For example, Lin et al. (2020) argued that using Local SGD can be more efficient than traditional Minibatch SGD in some settings. Ortiz et al. (2021) also conducted experiments studying the trade-offs of using Local SGD in training image classification models.

The most popular algorithm in the federated optimization literature is Local SGD or Federated Averaging (Wang, Charles, et al., 2021). It is a generalization of minibatch SGD that, rather than communicating at every step of the optimization process, communicates only intermittently. Local SGD shows remarkable efficiency in many settings in practice, and therefore its convergence and generalization properties have been the subject of intense theoretical investigation over the past few years (Stich, 2019; Khaled, Mishchenko, and Richtárik, 2020; Woodworth, Patel, Stich, et al., 2020; Woodworth, Patel, and Srebro, 2020; Patel, Glasgow, Wang, et al., 2023; Glasgow, Yuan, and Ma, 2022; Gu, Lyu, Huang, et al., 2023; Patel, Glasgow, Zindari, et al., 2024). Many variants of Local SGD exist, including those that use random reshuffling instead of i.i.d. sampling locally (Yun, Rajput, and Sra, 2022; Mishchenko, Khaled, and Richtárik, 2022), adaptive methods such as Adam (Reddi et al., 2021; Wang, Lin, and Chen, 2022), and modifications to handle data heterogeneity (Karimireddy et al., 2020; Mitra et al., 2021), personalization (Hanzely et al., 2020), or additionally use gradient compression (Haddadpour et al., 2021; Safaryan, Hanzely, and Richtárik, 2021). Generalized Local SGD, where we use two stepsizes (as in Algorithm 1), is known to be important in managing the trade-off between converging quickly and converging to a mismatched point in heterogeneous distributed optimization (Woodworth, Patel, and Srebro, 2020; Charles and Konečný, 2020; Patel, Glasgow, Zindari, et al., 2024). Our focus here is on the *homogeneous* or i.i.d. data setting; Here, the most related works are (Karimireddy et al., 2020; Malinovsky, Mishchenko, and Richtárik, 2022; Jhunjhunwala, Wang, and Joshi, 2023; Sun et al., 2023) and we discuss our work’s relation to theirs in detail in the next section after reviewing some preliminaries.

### 3 Theory

In this section we conduct the study our main algorithm, Generalized Local SGD (Algorithm 1 with  $\text{LocalUpdate}(y, g) = y - \eta g$  and  $\text{OuterUpdate}(x, \Delta) = x - \gamma \Delta$ ). We first review some preliminaries, then present our main results.

#### 3.1 Preliminaries

We are solving the optimization problem  $\min_{x \in \mathbb{R}^d} f(x)$ , where we assume  $f$  satisfies the following curvature and regularity condition.

**Assumption 3.1.** The function  $f$  is differentiable, convex, has  $L$ -Lipschitz gradients, and has a minimizer  $x_*$ .

We suppose that we can access a *stochastic first-order oracle* that given a point  $x$  returns a gradient  $g(x)$  that satisfies the following assumption.

**Assumption 3.2.** Given a point  $x \in \mathbb{R}^d$ , the stochastic gradients  $g(x) \in \mathbb{R}^d$  are (a) unbiased in expectation  $\mathbb{E}[g(x)] = \nabla f(x)$ , and (b) has variance bounded as  $\mathbb{E}[\|g(x) - \nabla f(x)\|^2] \leq \sigma^2$ , where  $\mathbb{E}[\cdot]$  denotes the expectation operator.

Our setting is distributed, but with identically distributed data: there are  $M$  different nodes, but they all sample stochastic gradients from the same data distribution in an i.i.d. (independent and identically distributed) manner. We denote the inner product between two vectors  $a$  and  $b$  by  $\langle a, b \rangle$  and by  $\|\cdot\|$  the corresponding Euclidean norm. For the purpose of theoretical analysis, can write Generalized Local SGD succinctly as

$$\begin{aligned} y_{m,r,0} &= x_r, & g_{m,r,h} &= \text{Stochastic gradient of } y_{m,r,h} \\ y_{m,r,h+1} &= y_{m,r,h} - \eta g_{m,r,h}, & \text{for } m = 1, \dots, M \text{ in parallel and } h = 0, 1, \dots, H-1 \text{ in sequence.} \\ x_{r+1} &= x_r - \gamma \eta \sum_{h=0}^{H-1} \frac{1}{M} \sum_{m=1}^M g_{m,r,h}. \end{aligned} \quad (\text{GEN-LOC-SGD})$$

To simplify our analysis, we follow (Stich, 2019) and define the virtual sequences

$$\begin{aligned} y_{r,h} &\stackrel{\text{def}}{=} \frac{1}{M} \sum_{m=1}^M y_{m,r,h}, & g_{r,h} &\stackrel{\text{def}}{=} \frac{1}{M} \sum_{m=1}^M g_{m,r,h} \\ \bar{g}_{m,r,h} &\stackrel{\text{def}}{=} \mathbb{E}_{r,h-1} [g_{m,r,h}] = \nabla f(y_{m,r,h}), & \bar{g}_{r,h} &\stackrel{\text{def}}{=} \mathbb{E}_{r,h-1} [g_{r,h}]. \end{aligned} \quad (1)$$

### 3.2 Main convergence result

Recall that we consider Algorithm 1 the particular case when  $\text{LocalUpdate}(y, g) = y - \eta g$  and  $\text{OuterUpdate}(x, \Delta) = x - \gamma \Delta$ .

**Existing results on the convergence of Gen. Local SGD.** When the outer stepsize  $\gamma = 1$ , the convergence of (GEN-LOC-SGD) is very well understood, with tightly matching upper and lower bounds (Khaled, Mishchenko, and Richtárik, 2020; Woodworth, Patel, Stich, et al., 2020; Glasgow, Yuan, and Ma, 2022). In particular, the best rate for the algorithm is

$$\mathbb{E} \left[ f \left( \frac{1}{RH} \sum_{r=0}^{R-1} \sum_{h=0}^{H-1} y_{r,h} \right) \right] - f(x_*) \leq \mathcal{O} \left( \frac{L \|x_0 - x_*\|^2}{RH} + \frac{\sigma \|x_0 - x_*\|}{\sqrt{MRH}} + \frac{L^{\frac{1}{3}} \sigma^{\frac{2}{3}} \|x_0 - x_*\|^{\frac{4}{3}}}{H^{\frac{1}{3}} R^{\frac{2}{3}}} \right). \quad (2)$$

The first two terms in the above convergence guarantee show that increasing the number of local steps has the same effect as increasing the number of communication rounds  $R$ , and are identical to the convergence guarantee of doing  $RH$  steps of SGD with minibatch size  $M$ . Local SGD differs from ordinary minibatch SGD in the last term, which shows different scaling between  $H$  and  $R$ , where increasing  $R$  helps more than increasing  $H$ . This is because increasing  $H$  incurs additional *client drift* that slows down the convergence of the algorithm in the presence of stochastic gradient noise. When the outer stepsize  $\gamma$  is allowed to vary, the convergence of the algorithm is less clear. Karimireddy et al. (2020) gives the following convergence rate in the absence of data heterogeneity,

$$\mathbb{E} \left[ f \left( \frac{1}{R} \sum_{r=0}^{R-1} x_r \right) \right] - f(x_*) \leq \mathcal{O} \left( \frac{L \|x_0 - x_*\|^2}{R} + \frac{\sigma \|x_0 - x_*\|}{\sqrt{MR}} \right),$$

for specially chosen  $\eta$  and  $\gamma$  pairs. This rate matches that of Minibatch SGD, but does not recover the convergence rate of vanilla Local SGD given by Equation (2). Jhunhunwala, Wang, and Joshi (2023) also give a guarantee for Generalized Local SGD with a specific outer learning rate that is always at least 1 and that depends on the heterogeneity of the iterates across the different clients. Since the analysis is conducted in the heterogeneous setting, the local stepsize required to scale with  $1/H$ . A guarantee that applies to any outer learning rate in the nonconvex, heterogeneous setting given by (Sun et al., 2023).

The limiting factor in existing analysis is that we are forced to choose the local stepsize  $\eta$  to scale as  $\frac{1}{LH}$ , whereas to obtain Equation (2) we sometimes need to choose  $\eta$  to be much larger, on the order of  $\frac{1}{L}$ . If we aim to accurately characterize the convergence of (GEN-LOC-SGD), our analysis has to encompass both large and small local stepsizes  $\eta$ .

**New analysis.** We now present our main convergence theorem for (GEN-LOC-SGD).

**Theorem 3.3.** Suppose that Assumptions 3.1 and 3.2 hold. Then the iterates generated by Generalized Local SGD run with local stepsize  $\eta > 0$  and outer stepsize  $\gamma > 0$  for  $R$  communication

164 rounds and with  $H$  local steps per round satisfy,

$$\mathbb{E} \left[ f \left( \frac{1}{RH} \sum_{r=0}^{R-1} \sum_{h=0}^{H-1} y_{r,h} \right) \right] - f(x_*) \leq \mathcal{O} \left( \frac{\|x_0 - x_*\|^2}{\eta\gamma RH} + \frac{\eta\sigma^2(1 + (\gamma - 1)_+)}{M} + L\eta^2\sigma^2H \right), \quad (3)$$

165 where  $(a)_+ = \max(a, 0)$ . and provided the stepsizes  $\eta$  and  $\gamma$  jointly satisfy  $\eta L(1 + (\gamma - 1)_+H) \leq \frac{1}{4}$ .

166 **Implications of Theorem 3.3.** Before giving a proof sketch for Theorem 3.3, we first discuss its  
 167 implications. Observe that when  $\gamma \leq 1$ , we are allowed to choose  $\eta$  larger than  $\Omega(\frac{1}{LH})$ . This is  
 168 crucial to obtain the rate of Equation (2). Indeed, when  $\gamma = 1$ , the requirement on  $\eta$  reduces to  
 169  $\eta L \leq \frac{1}{4}$  and we can choose  $\eta$  following (Woodworth, Patel, Stich, et al., 2020) as

$$\eta = \min \left( \frac{1}{4L}, \sqrt{\frac{M\|x_0 - x_*\|^2}{\sigma^2 RH}}, \left[ \frac{\|x_0 - x_*\|^2}{L\sigma^2 H^2 R} \right]^{\frac{1}{3}} \right)$$

170 Plugging this choice of  $\eta$  yields the convergence guarantee of Equation (2). Alternatively, when  
 171  $8\eta L \leq 1$ , the stepsize requirement is met if we choose  $\eta\gamma LH \leq \frac{1}{8}$  and we immediately get the  
 172 Minibatch SGD guarantee. In particular, choose  $\eta = \mathcal{O}(\frac{1}{RL})$  and  $\gamma = \mathcal{O}(\frac{\gamma_*}{\eta LH})$ , the rate then becomes

$$f(y_{\text{out}}) - f(x_*) \leq \frac{8L\|x_0 - x_*\|^2}{\gamma_* R} + \frac{\sigma^2 H}{8R^2 L} + \frac{\gamma_* \sigma^2}{4LMH},$$

173 where  $y_{\text{out}}$  denotes the average over all iterations and clients as in Equation (3). Then for  $R$  large  
 174 enough we can choose  $\gamma_* = \mathcal{O} \left( \sqrt{\frac{LD^2\sigma^2 MH}{R\sigma^2}} \right)$  and this gives us the minibatch SGD rate

$$f(y_{\text{out}}) - f(x_*) \leq \frac{LD^2}{R} + \frac{\sigma D}{\sqrt{MRH}}.$$

175 This confirms the intuition that at the extremes, manipulating the stepsizes  $\gamma$  and  $\eta$  allows us to  
 176 interpolate between minibatch SGD and (vanilla) Local SGD, as observed by (Woodworth, Patel,  
 177 and Srebro, 2020). In fact, Theorem 3.3 allows us to go a step further and get an explicit expression  
 178 for the optimal inner and outer stepsizes depending on the problem parameters. This is given by the  
 179 following proposition.

180 **Proposition 3.4.** Let  $h(\eta, \gamma)$  be defined as

$$h(\eta, \gamma) = \frac{D^2}{\eta\gamma RH} + L\sigma^2 H\eta^2 + \frac{\eta(1 + (\gamma - 1)_+)\sigma^2}{M}. \quad (4)$$

181 Consider the optimization problem:

$$\min_{\eta > 0, \gamma > 0} h(\eta, \gamma) \quad \text{subject to} \quad \eta L(1 + (\gamma - 1)_+H) \leq \frac{1}{4}. \quad (5)$$

182 The solution  $(\eta^*, \gamma^*)$  is given by comparing the following two candidates.

183 1. Candidate  $(\eta_A^*, \gamma_A^*)$  defined by  $\gamma_A^* = 1$  and  $\eta_A^* = \min(\frac{1}{4L}, \eta'_A)$  where  $\eta'_A$  is the unique  
 184 positive root of the cubic equation

$$2LH\sigma^2\eta^3 + \frac{\sigma^2}{M}\eta^2 - \frac{D^2}{RH} = 0.$$

185 2. Candidate  $(\eta_B^*, \gamma_B^*)$  for the regime  $\gamma \geq 1$  with  $4\eta L < 1$ , where (a) the constraint is enforced  
 186 with equality:

$$\gamma_B(\eta) = 1 + \frac{1}{H} \left( \frac{1}{4L\eta} - 1 \right),$$

187 and (b)  $\eta_B^*$  is the unique positive root of the cubic equation

$$-\frac{4L^2 D^2 (H - 1)}{R} + 2L\sigma^2 H\eta(\eta L(H - 1) + 1)^2 + \frac{\sigma^2 (H - 1)}{MH}(\eta L(H - 1) + 1)^2 = 0.$$

188 The optimal solution  $(\eta^*, \gamma^*)$  is the candidate pair from  $\{(\eta_A^*, \gamma_A^*), (\eta_B^*, \gamma_B^*)\}$  that yields the smaller  
 189 value of  $h(\eta, \gamma)$ .

The proof of the above proposition is straightforward and follows by writing the KKT conditions for the optimization problem in Equation (5). A consequence of Proposition 3.4 is that in the case of ill-tuning of the inner stepsize  $\eta$ , a large outer stepsize  $\gamma$  can make up for it. For example, if  $\sigma \rightarrow 0$  and  $\eta LH \ll \mathcal{O}(1)$ , we can make up for this by choosing  $\gamma$  as  $\frac{1}{\eta LH}$ . Thus, we can interpret the outer learning rate  $\gamma$  as having **two dual roles**. (a) It allows us to interpolate between minibatch SGD ( $\gamma > 1$ ) and vanilla Local SGD ( $\gamma = 1$ ), giving us the better of the two rates, and (b) it provides us some additional leeway in hyperparameter tuning by making up for ill-tuned inner learning rate  $\eta$ .

Our theory suggests that *in the worst case*, choices of  $\gamma < 1$  are *not* useful from an optimization perspective. We should either choose  $\gamma = 1$  or  $\gamma > 1$ . This can be seen even on quadratic objectives, for example if  $f(x) = \frac{x^\top Q x}{2}$  for some positive definite matrix  $Q$ , then a straightforward computation gives the expected iterate after  $H$  local steps and  $R$  communication rounds is

$$\mathbb{E}[x_R] = ((1 - \gamma)I + \gamma(I - \eta Q)^H)x_0.$$

From this, it is clear that if  $\eta$  is chosen such that  $(I - \eta Q)^H$  has eigenvalues smaller than 1, we should choose  $\gamma \geq 1$ . While if  $(I - \eta Q)^H$  has any eigenvalues larger than 1, we should just choose  $\gamma = 0$  (i.e. just don't apply the algorithm at all). In other words,  $\gamma$  can make up for a learning rate that is too small, but not a learning rate that is too large. This observation does not exclude that  $\gamma < 1$  can be useful from a *generalization* perspective, as noted for the case of a single client by Zhou et al. (2021), in the presence of data heterogeneity, as noted by Charles and Konečný (2021), or in the presence of time-varying noise (see next subsection).

**Proof sketch for Theorem 3.3.** We first start by expanding the update for the round iterate  $x_{r+1} - x_*$  similar to (Karimireddy et al., 2020) to get,

$$\begin{aligned} \|x_{r+1} - x_*\|^2 &= \|x_r - x_*\|^2 - 2\gamma\eta \sum_{h=0}^{H-1} \langle x_r - x_*, g_{r,h} \rangle + \gamma^2\eta^2 \left\| \sum_{h=0}^{H-1} g_{r,h} \right\|^2 \\ &= \|x_r - x_*\|^2 - 2\gamma\eta \sum_{h=0}^{H-1} \langle x_r - y_{r,h}, g_{r,h} \rangle - 2\gamma\eta \sum_{h=0}^{H-1} \langle y_{r,h} - x_*, g_{r,h} \rangle + \gamma^2\eta^2 \left\| \sum_{h=0}^{H-1} g_{r,h} \right\|^2, \end{aligned}$$

where  $g_{r,h}$  is defined as in Equation (1). Karimireddy et al. (2020) and Jhunjunwala, Wang, and Joshi (2023) control the inner product  $-\langle x_r - y_{r,h}, g_{r,h} \rangle$  by either using smoothness or Young's inequality; This would force us to bound the stray  $\|y_{r,h} - x_r\|^2$  and take the local stepsize  $\eta$  to be small in order to ensure convergence. Instead, we rely on bounding this quantity directly by viewing it as the *regret* in the online convex optimization sense with respect to the comparator  $x_r$ . Observe that the virtual sequence of averaged local iterates satisfies  $y_{r,h+1} = y_{r,h} - \eta g_{r,h}$ , and thus through standard regret analysis we have

$$\sum_{h=0}^{H-1} -\langle x_r - y_{r,h}, g_{r,h} \rangle = \frac{-\|y_{r,H} - x_r\|^2}{2\eta} + \frac{\eta}{2} \sum_{h=0}^{H-1} \|g_{r,h}\|^2. \quad (6)$$

The negative terms  $-\|y_{r,H} - x_r\|^2$  in Equation (6) turn out to be crucial in obtaining an analysis that works for all  $\eta$  and not just small  $\eta$ . With this change and through carefully bounding the variance terms following (Khaled, Mishchenko, and Richtárik, 2020; Woodworth, Patel, Stich, et al., 2020), we obtain the guarantee of Theorem 3.3. The full proof is provided in Appendix B.2.

**Comparison with results on related algorithms.** Malinovsky, Mishchenko, and Richtárik (2022) analyze a closely related variant of the algorithm that uses federated random reshuffling (Mishchenko, Khaled, and Richtárik, 2022) as a base. This is a significantly different algorithm that doesn't allow for an arbitrary number of local steps  $H$  and depends on  $f$  possessing finite-sum structure. Nevertheless, we can still specialize (Malinovsky and Richtárik, 2022, Theorem 2) approximately to our setting, by using  $H$  as the number of data points in an epoch. In our notation, their convergence guarantee reads

$$\mathbb{E} \left[ f \left( \frac{1}{R} \sum_{r=0}^{R-1} x_r \right) \right] - f(x_*) \leq \mathcal{O} \left( \frac{\|x_0 - x_*\|^2}{\eta\gamma HR} + \eta^2 H^2 \sigma^2 \right),$$

under the conditions  $\eta H \leq \frac{1}{L}$  and  $1 \leq \gamma \leq \frac{1}{L\eta H}$ . Their theory thus also suggests that  $\gamma \geq 1$  can be useful. Optimizing over  $\eta$  and  $\gamma$  yields the convergence rate

$$\mathbb{E} \left[ f \left( \frac{1}{R} \sum_{r=0}^{R-1} x_r \right) \right] - f(x_*) \leq \mathcal{O} \left( \frac{L\|x_0 - x_*\|^2}{R} \right),$$



this rate is the same as gradient descent for  $R$  steps (since the finite-sum structure means that per-epoch we approximate one step of gradient descent when  $\eta$  is small). A similar rate is derived in (Li, Acharya, and Richtárik, 2024; Li and Richtárik, 2024) if we have access to the proximal operator (i.e. we can do *many* local steps  $H$  on a modified objective). Li, Acharya, and Richtárik (2024) in particular show that an outer learning rate greater than 1 can be particularly useful for improving the convergence of FedProx (Li, Sahu, et al., 2020) in the heterogeneous setting when the smoothness constant varies significantly between different clients.

Our analysis suggests that values of  $\gamma > 1$  are potentially very useful, but in practice such values are rarely used. One reason this might be the case is because the momentum effectively acts as a stepsize multiplier, i.e. in the presence of momentum parameter  $\mu$  the effective outer stepsize becomes  $\frac{\gamma}{1-\mu}$ . Our next theorem establishes this rigorously, at least when we assume iterate boundedness.

**Theorem 3.5.** *Suppose that Assumptions 3.1 and 3.2 hold. Suppose additionally that all the iterates remain bounded by some  $D > 0$  as  $\|x_r\| \leq D$ . Suppose additionally that the outer update is gradient descent with momentum,  $\text{OuterUpdate}(x_r, -\Delta_{r,H}) = x_r + \gamma\Delta_{r,H} + \mu(x_r - x_{r-1})$  and the local update is gradient descent  $\text{LocalUpdate}(y, g) = y - \eta g$ . Then the iterates generated by the algorithm satisfy*

$$\mathbb{E}[f(\bar{y})] - f(x_*) \leq \mathcal{O}\left(\frac{D^2(1-\mu)}{\eta\gamma RH} + \frac{\eta\sigma^2(1 + (\frac{\gamma}{1-\mu} - 1)_+)}{M} + L\eta^2\sigma^2H + LD^2\mu^2\right),$$

where  $\bar{y}$  is defined as the average of all local iterates across training (as in Equation (3)) and  $(a)_+ = \max(a, 0)$ . and provided the hyperparameters  $\eta, \mu$ , and  $\gamma$  jointly satisfy

$$\eta\left(1 + \left(\frac{\gamma}{1-\mu} - 1\right)_+ H\right) \leq \frac{1}{4}.$$

The proof is provided in Appendix B.2. Theorem 3.5 shows the requirement on the outer stepsize is relaxed from a requirement on  $\gamma$  to a requirement on  $\frac{\gamma}{1-\mu}$ , allowing us to reap the same benefits of  $\gamma > 1$  observed earlier if we also tune  $\mu$ . This benefit was first observed in (Sun et al., 2023) for nonconvex optimization with small local stepsize  $\eta$  provided we use an additional momentum buffer. Our work gives direct theoretical support to this observation even with a single momentum buffer and for any trio of hyperparameters  $(\eta, \gamma, \mu)$ , allowing for large  $\eta$ . We believe the bounded domain assumption can be removed, but leave that to the future work.

### 3.3 Adaptive convergence result

To further understand the role of the outer stepsize, we now present a data-dependent, high-probability guarantee for Generalized Local SGD in Theorem 3.6, compared to the rather worst-case analysis of Theorem 3.3. This analysis may also provide insights into practical tuning of the outer learning rate

**Theorem 3.6.** *Suppose that Assumptions 3.1 and 3.2 hold. Then in Algorithm 1 with outer update  $x = x - \gamma\Delta$  and local update  $y = y - \eta g$ , if the local stepsize satisfies  $\eta \leq \frac{1}{L}$  then with probability at least  $1 - \delta$  the iterates generated satisfy*

$$\begin{aligned} f\left(\frac{1}{RH} \sum_{r=0}^{R-1} \sum_{h=0}^{H-1} y_{r,h}\right) - f(x_*) &\leq \tilde{\mathcal{O}}\left(\frac{\|x_0 - x_*\|^2}{\gamma\eta RH} + \frac{\gamma\eta}{RH} \sum_{r,h} \|g_{r,h}\|^2 + \gamma\eta\sigma^2\right. \\ &\quad \left.+ \frac{|1-\gamma|\eta}{RH} \sum_r \left(\sum_h \|g_{r,h}\|\right)^2 + \frac{\eta}{\gamma H} \left(\frac{1}{M} \max_r \sum_{m,h} \|g_{m,r,h}\|\right)^2 + \eta\sigma\sqrt{\frac{1}{MR} \sum_{m,r,h} \|g_{m,r,h}\|^2}\right). \end{aligned}$$

The proof of Theorem 3.6 is provided in Appendix B.4. Compared to Theorem 3.3, the guarantee we obtain here is weaker in some areas, e.g., the variance term  $\gamma\eta\sigma^2$  does not benefit from increasing  $M$ . On the other hand, this guarantee is a high-probability and data-dependent guarantee. To the best of our knowledge, this is the first high-probability convergence guarantee for Local SGD in the literature. Theorem 3.6 allows us to observe another potential benefit of using  $\gamma \neq 1$ . To see how, let us make the simplifying assumption that  $\|\hat{g}_{r,h}\| \cong G_1$  and  $\|g_{m,r,h}\| \cong G_2$ . Observe that by the triangle inequality we have  $G_1 \leq G_2$ , but in fact  $G_1$  can be significantly smaller than  $G_2$ ,

particularly in the later stages of the optimization process, due to the variance reduction effect of averaging together the gradients on different nodes. Then we can rewrite the above guarantee as

$$f\left(\frac{1}{RH} \sum_{r=0}^{R-1} \sum_{h=0}^{H-1} y_{r,h}\right) - f(x_*) \leq \tilde{O}\left(\frac{d_0^2}{\gamma \eta RH} + \gamma \eta G_1^2 + \gamma \eta \sigma^2 + |1-\gamma| \eta H G_1^2 + \frac{\eta H G_2^2}{\gamma} + \eta \sigma \sqrt{H} G_2\right) \quad (7)$$

The  $\gamma$  that minimizes this upper bound is given by the following proposition.

**Proposition 3.7.** Let  $g(x) = \frac{a}{x} + bx + |1-x|c$  for  $a, b, c \geq 0$ .

- if  $a \geq b + c$ , then  $\sqrt{a/(b+c)}$  minimizes  $g$ ,
- if  $b - c \geq 0$  and  $a \leq b - c$ , then  $\sqrt{a/(b-c)}$  minimizes  $g$ ,
- Otherwise,  $x = 1$  minimizes  $g$ .

Applying this lemma to Equation (7) one can see that simple averaging is suboptimal depending on the variance and relative magnitudes of  $G_1$  and  $G_2$ . In particular, the first condition in our setting is

$$\frac{d_0^2}{\eta RH} + \eta H G_2^2 \gtrsim \eta(G_1^2 + \sigma^2) + \eta H G_1^2,$$

where  $\gtrsim$  indicates that the inequality holds up to constant factors of the terms on both sides. Since  $G_2 \geq G_1$ , we can simplify the above condition to  $\frac{d_0^2}{\eta^2 RH} + H G_2^2 \gtrsim \sigma^2$ . This condition essentially asks if the noise is large relative to the “optimization term”  $\frac{d_0^2}{\eta^2 RH}$  or not. In the latter case, choosing  $\gamma > 1$  is helpful, and the outer optimizer acts as a form of momentum that helps reduce the optimization term further. On the other hand, the second condition yields  $\gamma < 1$  and requires that  $\sigma^2 \gtrsim \frac{d_0^2}{\eta^2 RH} + H G_2^2$ . This is an especially noise-dominated regime, which we may expect to observe towards the end of the training process. In this case, decaying the outer learning rate to  $\gamma \ll 1$  allows the algorithm to maintain convergence despite the high noise magnitude. When the optimization term and the noise term are of the same order, then  $\gamma = 1$  is the optimal choice.

## 4 Experiments

We conduct two sets of experiments: (a) solving convex optimization problems to provide the most direct verification of the predictions of our theory, and (b) training transformer based language models. Due to limitations of space, we present only highlights of the results here and most of the details and ablations are provided in the supplementary materials (Appendix A).

### 4.1 Convex optimization

We conduct experiments on the quadratic objective  $f(x) = \frac{1}{2} \|Q(x - x_*)\|^2$ , where  $Q = A^\top A \in \mathbb{R}^d$  for  $d = 50$  and the entries  $A_{i,j}$  are all drawn from a normal distribution  $A_{i,j} \sim \mathcal{N}(0, 1)$  for  $i = 1, \dots, d$  and  $j = 1, \dots, d$ , and  $x_*$  is similarly drawn from the standard  $d$ -dimensional Gaussian. We use stochastic gradients of the form  $g(x) = \nabla f(x) + v$ , where the  $v$ ’s are random vectors drawn from the Gaussian with mean 0 and variance  $\sigma^2$ ,  $v \sim \mathcal{N}(0, \sigma^2)$ . We evaluate the performance of Algorithm 1 for various values of  $\sigma$ ,  $\sigma \in \{10^{-3}, 10^{-2}, 10^{-1}, 0.5, 1, 5, 10, 15, 25, 50\}$ . For each  $\sigma$  we perform an extensive grid search over  $\gamma \in \{0.001, 0.01, 0.1, 0.5, 0.9, 1.0, 1.1, 1.25, 1.5, 2\}$  to determine the best one in terms of minimum average loss over the last ten rounds. We use  $R = 1000$  rounds and  $H = 50$  local steps, and fix  $\eta = 0.001$  in all cases.

Figure 1(a) shows how the optimal value of  $\gamma$  varies with different noise levels  $\sigma$ . We observe that, as  $\sigma$  increases, the optimal  $\gamma$  decreases from 1.0 to 0.1, as predicted by our analysis. Figure 1(b) also illustrates the loss trajectories for different noise levels  $\sigma$  with the best  $\gamma$ .

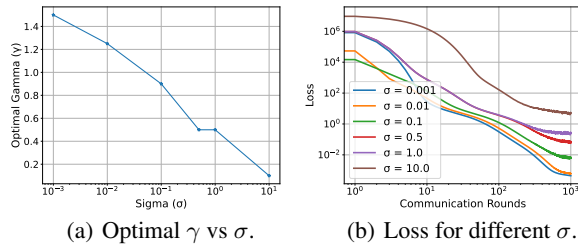

Figure 1: Effect of varying  $\sigma$  and  $\gamma$  for quadratic problem



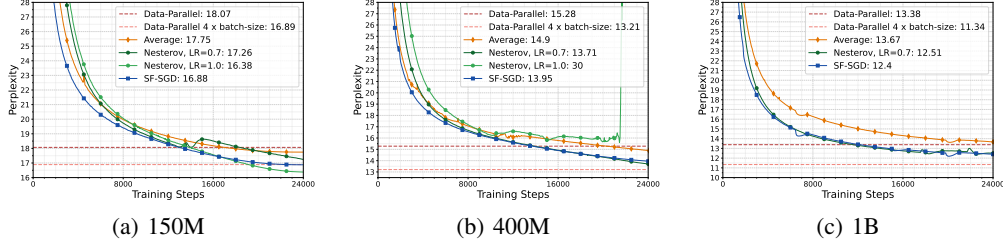

Figure 2: **Scaling** distributed pretraining, at 150M, 400M, and 1B parameters.

## 4.2 Transformer pretraining

**Setup** Following the DiLoCo paper (Douillard, Feng, Rusu, Chhaparia, et al., 2023), we experiment using a Chinchilla decoder transformer (Hoffmann et al., 2022) on the C4 dataset (Raffel et al., 2020). The architecture hyperparameters are identical from the DiLoCo paper (Douillard, Feng, Rusu, Chhaparia, et al., 2023) and are given in Appendix A.1.1. We fix the batch size at 512 and the sequence length at 1024. We experiment at different scales, from 150 million to 1 billion parameters. For all experiments, the inner optimizer is AdamW (Loshchilov and Hutter, 2019) trained with a cosine learning rate schedule defined across the total amount of steps. The inner optimizer state is never shared across replicas, and is passed from one round to the other.

**Methods** We compare three distributed methods, using different outer optimizers: SGD(lr=1) (equivalent to simple averaging of local models (McMahan et al., 2017)), Nesterov (equivalent to DiLoCo (Douillard, Feng, Rusu, Chhaparia, et al., 2023)), and ScheduleFree-SGD (SF-SGD) (Defazio et al., 2024). We use SF-SGD to substitute for outer learning rate scheduling, though it still requires tuning hyperparameters. We also include two “high-communication” data-parallel baselines: one with the global batch size as the local per-replica batch size used by the distributed methods, and one with the same batch size as the global batch size ( $M \times$  the local per-replica batch size) used by the distributed methods. The latter requires either more GPUs and more thus communication, or gradient accumulation and thus more time. The latter also has an equal flops budget as the distributed methods. We tuned all our optimizers on the pretraining setting on a separate validation set. We also considered using SF-Nesterov, but it was hard to tune and unstable.

**Results** Table 1 gives the optimal hyperparameters per scale, and Figure 2 gives the perplexity curves. Consistent with the predictions of our theory, we found that an outer learning rate greater than 1.0 performed best for SF-SGD and an effective outer learning rate greater than 1.0 performed best for both Nesterov (in Nesterov, the effective learning rate is  $\frac{0.7}{1-0.9}$  for momentum parameter 0.9). In the supplementary material, we report the effect of varying the number of local steps (Appendix A.1.2), the number of clients/replicas and different ways of FLOPs allocation (Appendix A.1.3), and gradient variance (Appendix A.1.6).

| Hyperparameter                  | Selected  | Range considered  |
|---------------------------------|-----------|-------------------|
| Number of inner steps $H$       | 50, 500   | 50 to 2000        |
| Peak outer LR for Nesterov      | 0.7       | 0.1 to 2.0        |
| Peak outer LR for SF-SGD        | 2.0       | $1e^{-4}$ to 10.0 |
| b1 for SF-SGD                   | 0.2       | 0.0 to 0.99       |
| Peak inner learning rate (150M) | $4e^{-4}$ | $4e^{-4}$         |
| Peak inner learning rate (400M) | $4e^{-4}$ | $4e^{-4}$         |
| Peak inner learning rate (1B)   | $2e^{-4}$ | $2e^{-4}$         |

Table 1: **Optimizer hyperparameters** for the three evaluated sizes. All are based on the transformer architecture, chinchilla-style (Hoffmann et al., 2022).

## 5 Conclusion and Future Work

In this paper, we studied the impact of the outer learning rate on the convergence of Local SGD through two novel convergence theorems that characterize its role in balancing a trade-off between convergence speed and stochastic gradient variance. We have also studied the impact of using momentum in the presence of an outer learning rate, but derived our result under the assumption of a bounded domain. This opens several avenues for future work: study the impact of Nesterov acceleration on convergence, extend this work to address the challenges of data heterogeneity, investigate the role of adaptive outer optimizers in enhancing robustness to client failures and communication delays.

## References

- Bauschke, Heinz H. and Patrick L. Combettes (2009). “The Baillon-Haddad Theorem Revisited”. In: *arXiv preprint abs/0906.0807*. URL: <https://arXiv.org/abs/0906.0807>.
- Borzunov, Alexander, Dmitry Baranchuk, Tim Dettmers, Max Ryabinin, Younes Belkada, Artem Chumachenko, Pavel Samygin, and Colin Raffel (2022). “Petals: Collaborative Inference and Fine-tuning of Large Models”. In: *arXiv*.
- Brown, Tom B., Benjamin Mann, Nick Ryder, Melanie Subbiah, Jared Kaplan, Prafulla Dhariwal, Arvind Neelakantan, Pranav Shyam, Girish Sastry, Amanda Askell, Sandhini Agarwal, Ariel Herbert-Voss, Gretchen Krueger, Tom Henighan, Rewon Child, Aditya Ramesh, Daniel M. Ziegler, Jeffrey Wu, Clemens Winter, Christopher Hesse, Mark Chen, Eric Sigler, Mateusz Litwin, Scott Gray, Benjamin Chess, Jack Clark, Christopher Berner, Sam McCandlish, Alec Radford, Ilya Sutskever, and Dario Amodei (2020). “Language Models are Few-Shot Learners”. In: *Advances in Neural Information Processing Systems 33: Annual Conference on Neural Information Processing Systems 2020, NeurIPS 2020, December 6-12, 2020, virtual*. Ed. by Hugo Larochelle, Marc’Aurelio Ranzato, Raia Hadsell, Maria-Florina Balcan, and Hsuan-Tien Lin. URL: <https://proceedings.neurips.cc/paper/2020/hash/1457c0d6bfc4967418bfb8ac142f64a-Abstract.html>.
- Charles, Zachary and Jakub Konečný (2021). “Convergence and Accuracy Trade-Offs in Federated Learning and Meta-Learning”. In: *The 24th International Conference on Artificial Intelligence and Statistics, AISTATS 2021, April 13-15, 2021, Virtual Event*. Ed. by Arindam Banerjee and Kenji Fukumizu. Vol. 130. Proceedings of Machine Learning Research. PMLR, pp. 2575–2583. URL: <http://proceedings.mlr.press/v130/charles21a.html>.
- Charles, Zachary and Jakub Konečný (2020). “On the Outsized Importance of Learning Rates in Local Update Methods”. In: *arXiv preprint abs/2007.00878*. URL: <https://arXiv.org/abs/2007.00878>.
- Defazio, Aaron, Xingyu Alice Yang, Harsh Mehta, Konstantin Mishchenko, Ahmed Khaled, and Ashok Cutkosky (2024). “The Road Less Scheduled”. In: *arXiv preprint abs/2405.15682*. URL: <https://arXiv.org/abs/2405.15682>.
- Diskin, Michael, Alexey Bukhtiyarov, Max Ryabinin, Lucile Saulnier, Quentin Lhoest, Anton Sinitin, Dmitry Popov, Dmitry Pyrkun, Maxim Kashirin, Alexander Borzunov, Albert Villanova del Moral, Denis Mazur, Ilia Kobrelev, Yacine Jernite, Thomas Wolf, and Gennady Pekhimenko (2021). “Distributed Deep Learning in Open Collaborations”. In: *Advances in Neural Information Processing Systems (NeurIPS)*.
- Douillard, Arthur, Qixuan Feng, Andrei A. Rusu, Rachita Chhaparia, Yani Donchev, Adhiguna Kuncoro, Marc’Aurelio Ranzato, Arthur Szlam, and Jiajun Shen (2023). “DiLoCo: Distributed Low-Communication Training of Language Models”. In: *arXiv preprint abs/2311.08105*. URL: <https://arXiv.org/abs/2311.08105>.
- Douillard, Arthur, Qixuan Feng, Andrei A. Rusu, Adhiguna Kuncoro, Yani Donchev, Rachita Chhaparia, Ionel Gog, Marc’Aurelio Ranzato, Jiajun Shen, and Arthur Szlam (2024). “Dipaco: Distributed Path Composition”. In: *arXiv preprint abs/2403.10616*. URL: <https://arXiv.org/abs/2403.10616>.
- Eichner, Hubert, Tomer Koren, Brendan McMahan, Nathan Srebro, and Kunal Talwar (2019). “Semi-cyclic stochastic gradient descent”. In: *International Conference on Machine Learning*. PMLR, pp. 1764–1773.
- Glasgow, Margalit R., Honglin Yuan, and Tengyu Ma (2022). “Sharp Bounds for Federated Averaging (Local SGD) and Continuous Perspective”. In: *International Conference on Artificial Intelligence and Statistics, AISTATS 2022, 28-30 March 2022, Virtual Event*. Ed. by Gustau Camps-Valls, Francisco J. R. Ruiz, and Isabel Valera. Vol. 151. Proceedings of Machine Learning Research. PMLR, pp. 9050–9090. URL: <https://proceedings.mlr.press/v151/glasgow22a.html>.
- Gu, Xinran, Kaifeng Lyu, Sanjeev Arora, Jingzhao Zhang, and Longbo Huang (2024). “A Quadratic Synchronization Rule for Distributed Deep Learning”. In: *International Conference on Learning Representations*.
- Gu, Xinran, Kaifeng Lyu, Longbo Huang, and Sanjeev Arora (2023). “Why (and When) Does Local Sgd Generalize Better Than Sgd?”. In: *arXiv preprint abs/2303.01215*. URL: <https://arXiv.org/abs/2303.01215>.
- Guo, Daya, Dejian Yang, Haowei Zhang, Junxiao Song, Ruoyu Zhang, Runxin Xu, Qihao Zhu, Shirong Ma, Peiyi Wang, Xiao Bi, et al. (2025). “DeepSeek-R1: Incentivizing Reasoning Capability in LLMs via Reinforcement Learning”. In: *arXiv preprint arXiv:2501.12948*.

412 Haddadpour, Farzin, Mohammad Mahdi Kamani, Aryan Mokhtari, and Mehrdad Mahdavi (2021).  
413 “Federated Learning with Compression: Unified Analysis and Sharp Guarantees”. In: *The 24th*  
414 *International Conference on Artificial Intelligence and Statistics, AISTATS 2021, April 13-15, 2021,*  
415 *Virtual Event*. Ed. by Arindam Banerjee and Kenji Fukumizu. Vol. 130. Proceedings of Machine  
416 Learning Research. PMLR, pp. 2350–2358. URL: <http://proceedings.mlr.press/v130/haddadpour21a.html>.  
417  
418 Hanzely, Filip, Slavomír Hanzely, Samuel Horváth, and Peter Richtárik (2020). “Lower Bounds and  
419 Optimal Algorithms for Personalized Federated Learning”. In: *Advances in Neural Information*  
420 *Processing Systems 33: Annual Conference on Neural Information Processing Systems 2020,*  
421 *NeurIPS 2020, December 6-12, 2020, virtual*. Ed. by Hugo Larochelle, Marc’Aurelio Ranzato, Raia  
422 Hadsell, Maria-Florina Balcan, and Hsuan-Tien Lin. URL: [https://proceedings.neurips.](https://proceedings.neurips.cc/paper/2020/hash/187acf7982f3c169b3075132380986e4-Abstract.html)  
423 [cc/paper/2020/hash/187acf7982f3c169b3075132380986e4-Abstract.html](https://proceedings.neurips.cc/paper/2020/hash/187acf7982f3c169b3075132380986e4-Abstract.html).  
424  
425 Hoffmann, Jordan, Sebastian Borgeaud, Arthur Mensch, Elena Buchatskaya, Trevor Cai, Eliza  
426 Rutherford, Diego de Las Casas, Lisa Anne Hendricks, Johannes Welbl, Aidan Clark, Tom  
427 Hennigan, Eric Noland, Katie Millican, George van den Driessche, Bogdan Damoc, Aurelia Guy,  
428 Simon Osindero, Karen Simonyan, Erich Elsen, Jack W. Rae, Oriol Vinyals, and Laurent Sifre  
429 (2022). “Training Compute-Optimal Large Language Models”. In: *Advances in Neural Information*  
430 *Processing Systems (NeurIPS)*.  
431  
432 Huang, Chao, Jianwei Huang, and Xin Liu (2022). *Cross-Silo Federated Learning: Challenges and*  
433 *Opportunities*. arXiv: 2206.12949 [cs.LG]. URL: <https://arxiv.org/abs/2206.12949>.  
434  
435 Jacob, Alex, Lorenzo Sani, Bill Marino, Preslav Aleksandrov, and Nicholas Donald Lane (2024).  
436 “Worldwide Federated Training of Language Models”. In: *arXiv preprint arXiv:2405.14446*.  
437  
438 Ivgi, Maor, Oliver Hinder, and Yair Carmon (2023). “DoG Is SGD’s Best Friend: a Parameter-Free  
439 Dynamic Step Size Schedule”. In: *arXiv preprint abs/2302.12022*. URL: [https://arXiv.org/](https://arXiv.org/abs/2302.12022)  
440 [abs/2302.12022](https://arXiv.org/abs/2302.12022).  
441  
442 Jaghouar, Sami, Jack Min Ong, Manveer Basra, Fares Obeid, Jannik Straube, Michael Keiblinger,  
443 Elie Bakouch, Lucas Atkins, Maziyar Panahi, Charles Goddard, et al. (2024). “INTELLECT-1  
444 Technical Report”. In: *arXiv preprint arXiv:2412.01152*.  
445  
446 Jaghouar, Sami, Jack Min Ong, and Johannes Hagemann (2024). “Opendiloco: an Open-Source Frame-  
447 work for Globally Distributed Low-Communication Training”. In: *arXiv preprint abs/2407.07852*.  
448 URL: <https://arXiv.org/abs/2407.07852>.  
449  
450 Jhunjhunwala, Divyansh, Shiqiang Wang, and Gauri Joshi (2023). “FedExP: Speeding Up Federated  
451 Averaging Via Extrapolation”. In: *CoRR*. arXiv: 2301.09604 [cs.LG]. URL: [http://arxiv.](http://arxiv.org/abs/2301.09604v2)  
452 [org/abs/2301.09604v2](http://arxiv.org/abs/2301.09604v2).  
453  
454 Jiang, Ziheng, Haibin Lin, Yinmin Zhong, Qi Huang, Yangrui Chen, Zhi Zhang, Yanghua Peng,  
455 Xiang Li, Cong Xie, Shibiao Nong, et al. (2024). “{MegaScale}: Scaling large language model  
456 training to more than 10,000 {GPUs}”. In: *21st USENIX Symposium on Networked Systems Design*  
457 *and Implementation (NSDI 24)*, pp. 745–760.  
458  
459 Karimireddy, Sai Praneeth, Satyen Kale, Mehryar Mohri, Sashank J. Reddi, Sebastian U. Stich, and  
460 Ananda Theertha Suresh (2020). “SCAFFOLD: Stochastic Controlled Averaging for Federated  
461 Learning”. In: *Proceedings of the 37th International Conference on Machine Learning, ICML 2020,*  
462 *13-18 July 2020, Virtual Event*. Vol. 119. Proceedings of Machine Learning Research. PMLR,  
463 pp. 5132–5143. URL: <http://proceedings.mlr.press/v119/karimireddy20a.html>.  
464  
465 Khaled, Ahmed, Konstantin Mishchenko, and Peter Richtárik (2020). “Tighter Theory for Local  
466 SGD on Identical and Heterogeneous Data”. In: *The 23rd International Conference on Artificial*  
467 *Intelligence and Statistics, AISTATS 2020, 26-28 August 2020, Online [Palermo, Sicily, Italy]*.  
468 Ed. by Silvia Chiappa and Roberto Calandra. Vol. 108. Proceedings of Machine Learning Research.  
469 PMLR, pp. 4519–4529. URL: <http://proceedings.mlr.press/v108/bayoumi20a.html>.  
470  
471 Koloskova, Anastasia, Nicolas Loizou, Sadra Boreiri, Martin Jaggi, and Sebastian U. Stich (2020).  
472 “A Unified Theory of Decentralized SGD with Changing Topology and Local Updates”. In:  
473 *Proceedings of the 37th International Conference on Machine Learning, ICML 2020, 13-18 July*  
474 *2020, Virtual Event*. Vol. 119. Proceedings of Machine Learning Research. PMLR, pp. 5381–5393.  
475 URL: <http://proceedings.mlr.press/v119/koloskova20a.html>.  
476  
477 Konečný, Jakub, H. Brendan McMahan, Felix X. Yu, Peter Richtárik, Ananda Theertha Suresh, and  
478 Dave Bacon (2016). “Federated Learning: Strategies for Improving Communication Efficiency”.  
479 In: *NIPS Private Multi-Party Machine Learning Workshop*.  
480  
481 Li, Hanmin, Kirill Acharya, and Peter Richtárik (2024). “The Power of Extrapolation in Federated  
482 Learning”. In: *CoRR*. arXiv: 2405.13766 [math.OG]. URL: [http://arxiv.org/abs/2405.](http://arxiv.org/abs/2405.13766v5)  
483 [13766v5](http://arxiv.org/abs/2405.13766v5).

Li, Hanmin and Peter Richtárik (2024). “On the Convergence of Fedprox With Extrapolation and Inexact Prox”. In: *CoRR*. arXiv: 2410.01410 [math.OC]. URL: <http://arxiv.org/abs/2410.01410v1>.

Li, Tian, Anit Kumar Sahu, Manzil Zaheer, Maziar Sanjabi, Ameet Talwalkar, and Virginia Smith (2020). “Federated Optimization in Heterogeneous Networks”. In: *Proceedings of Machine Learning and Systems 2020, MLSys 2020, Austin, TX, USA, March 2-4, 2020*. Ed. by Inderjit S. Dhillon, Dimitris S. Papailiopoulos, and Vivienne Sze. mlsys.org. URL: <https://proceedings.mlsys.org/book/316.pdf>.

Liang, Feng, Zhen Zhang, Haifeng Lu, Victor C. M. Leung, Yanyi Guo, and Xiping Hu (2024). “Communication-Efficient Large-Scale Distributed Deep Learning: a Comprehensive Survey”. In: *arXiv preprint abs/2404.06114*. URL: <https://arXiv.org/abs/2404.06114>.

Lin, Tao, Sebastian U. Stich, Kumar Kshitij Patel, and Martin Jaggi (2020). “Don’t Use Large Mini-batches, Use Local SGD”. In: *8th International Conference on Learning Representations, ICLR 2020, Addis Ababa, Ethiopia, April 26-30, 2020*. OpenReview.net. URL: <https://openreview.net/forum?id=B1ey01BFPr>.

Liu, Aixin, Bei Feng, Bing Xue, Bingxuan Wang, Bochao Wu, Chengda Lu, Chenggang Zhao, Chengqi Deng, Chenyu Zhang, Chong Ruan, et al. (2024). “Deepseek-v3 technical report”. In: *arXiv preprint arXiv:2412.19437*.

Liu, Bo, Rachita Chhaparia, Arthur Douillard, Satyen Kale, Andrei A. Rusu, Jiajun Shen, Arthur Szlam, and Marc’Aurelio Ranzato (2024). “Asynchronous Local-Sgd Training for Language Modeling”. In: *arXiv preprint abs/2401.09135*. URL: <https://arXiv.org/abs/2401.09135>.

Loshchilov, Ilya and Frank Hutter (2019). “Decoupled Weight Decay Regularization”. In: *7th International Conference on Learning Representations, ICLR 2019, New Orleans, LA, USA, May 6-9, 2019*. OpenReview.net. URL: <https://openreview.net/forum?id=Bkg6RiCqY7>.

Malinovsky, Grigory, Konstantin Mishchenko, and Peter Richtárik (2022). “Server-Side Stepsizes and Sampling Without Replacement Provably Help in Federated Optimization”. In: *arXiv preprint abs/2201.11066*. URL: <https://arXiv.org/abs/2201.11066>.

Malinovsky, Grigory and Peter Richtárik (2022). “Federated Random Reshuffling With Compression and Variance Reduction”. In: *arXiv preprint abs/2205.03914*. URL: <https://arXiv.org/abs/2205.03914>.

McMahan, H. Brendan, Eider Moore, Daniel Ramage, Seth Hampson, and Blaise Agüera y Arcas (2017). “Communication-Efficient Learning of Deep Networks from Decentralized Data”. In: *Proceedings of the 20th International Conference on Artificial Intelligence and Statistics (AISTATS)*.

Mishchenko, Konstantin, Ahmed Khaled, and Peter Richtárik (2022). “Proximal and Federated Random Reshuffling”. In: *ICML*. Vol. 162. Proceedings of Machine Learning Research. PMLR, pp. 15718–15749.

Mitra, Aritra, Rayana Jaafar, George J. Pappas, and Hamed Hassani (2021). “Achieving Linear Convergence in Federated Learning Under Objective and Systems Heterogeneity”. In: *arXiv preprint abs/2102.07053*. URL: <https://arXiv.org/abs/2102.07053>.

Murata, Tomoya and Taiji Suzuki (2021). “Bias-Variance Reduced Local SGD for Less Heterogeneous Federated Learning”. In: *Proceedings of the 38th International Conference on Machine Learning, ICML 2021, 18-24 July 2021, Virtual Event*. Ed. by Marina Meila and Tong Zhang. Vol. 139. Proceedings of Machine Learning Research. PMLR, pp. 7872–7881. URL: <http://proceedings.mlr.press/v139/murata21a.html>.

Ortiz, Jose Javier Gonzalez, Jonathan Frankle, Mike Rabbat, Ari Morcos, and Nicolas Ballas (2021). “Trade-Offs of Local SGD At Scale: an Empirical Study”. In: *arXiv preprint abs/2110.08133*. URL: <https://arXiv.org/abs/2110.08133>.

Patel, Kumar Kshitij, Margalit Glasgow, Lingxiao Wang, Nirmal Joshi, and Nathan Srebro (2023). “On the Still Unreasonable Effectiveness of Federated Averaging for Heterogeneous Distributed Learning”. In: *Federated Learning and Analytics in Practice: Algorithms, Systems, Applications, and Opportunities*. URL: <https://openreview.net/forum?id=vhS68bKv7x>.

Patel, Kumar Kshitij, Margalit Glasgow, Ali Zindari, Lingxiao Wang, Sebastian U. Stich, Ziheng Cheng, Nirmal Joshi, and Nathan Srebro (2024). “The Limits and Potentials of Local SGD for Distributed Heterogeneous Learning With Intermittent Communication”. In: *arXiv preprint abs/2405.11667*. URL: <https://arXiv.org/abs/2405.11667>.

Raffel, Colin, Noam Shazeer, Adam Roberts, Katherine Lee, Sharan Narang, Michael Matena, Yanqi Zhou, Wei Li, and Peter J. Liu (2020). “Exploring the limits of transfer learning with a unified text-to-text transformer”. In: *Journal of Machine Learning Research*.



530 Reddi, Sashank J., Zachary Charles, Manzil Zaheer, Zachary Garrett, Keith Rush, Jakub Konečný,  
531 Sanjiv Kumar, and Hugh Brendan McMahan (2021). “Adaptive Federated Optimization”. In: *9th*  
532 *International Conference on Learning Representations, ICLR 2021, Virtual Event, Austria, May*  
533 *3-7, 2021*. OpenReview.net. URL: <https://openreview.net/forum?id=LkFG3lB13U5>.

534 Rush, Keith, Zachary Charles, Zachary Garrett, Sean Augenstein, and Nicole Elyse Mitchell (2024).  
535 “DrJAX: Scalable and Differentiable MapReduce Primitives in JAX”. In: *International Conference*  
536 *on Machine Learning (ICML) Workshop*.

537 Safaryan, Mher, Filip Hanzely, and Peter Richtárik (2021). “Smoothness Matrices Beat Smoothness  
538 Constants: Better Communication Compression Techniques for Distributed Optimization”. In:  
539 *NeurIPS*, pp. 25688–25702.

540 Sani, Lorenzo, Alex Jacob, Zeyu Cao, Bill Marino, Yan Gao, Tomas Paulik, Wanru Zhao, William F  
541 Shen, Preslav Aleksandrov, Xinchu Qiu, et al. (2024). “The Future of Large Language Model  
542 Pre-training is Federated”. In: *arXiv preprint arXiv:2405.10853*.

543 Stich, Sebastian U. (2019). “Local SGD Converges Fast and Communicates Little”. In: *7th Inter-*  
544 *national Conference on Learning Representations, ICLR 2019, New Orleans, LA, USA, May 6-9,*  
545 *2019*. OpenReview.net. URL: <https://openreview.net/forum?id=S1g2JnRcFX>.

546 Sun, Jianhui, Xidong Wu, Heng Huang, and Aidong Zhang (2023). “On the Role of Server Momentum  
547 in Federated Learning”. In: *CoRR*. arXiv: 2312.12670 [cs.LG]. URL: <http://arxiv.org/abs/2312.12670v1>.

548 Wang, Jianyu, Zachary Charles, Zheng Xu, Gauri Joshi, H. Brendan McMahan, Blaise Aguerre y  
549 Arcas, Maruan Al-Shedivat, Galen Andrew, Salman Avestimehr, Katharine Daly, Deepesh Data,  
550 Suhas Diggavi, Hubert Eichner, Advait Gadhekar, Zachary Garrett, Antonios M. Girgis, Filip  
551 Hanzely, Andrew Hard, Chaoyang He, Samuel Horvath, Zhouyuan Huo, Alex Ingerman, Martin  
552 Jaggi, Tara Javidi, Peter Kairouz, Satyen Kale, Sai Praneeth Karimireddy, Jakub Konecny, Sanmi  
553 Koyejo, Tian Li, Luyang Liu, Mehryar Mohri, Hang Qi, Sashank J. Reddi, Peter Richtarik, Karan  
554 Singhal, Virginia Smith, Mahdi Soltanolkotabi, Weikang Song, Ananda Theertha Suresh, Sebastian  
555 U. Stich, Ameet Talwalkar, Hongyi Wang, Blake Woodworth, Shanshan Wu, Felix X. Yu, Honglin  
556 Yuan, Manzil Zaheer, Mi Zhang, Tong Zhang, Chunxiang Zheng, Chen Zhu, and Wennan Zhu  
557 (2021). “A Field Guide To Federated Optimization”. In: *arXiv preprint abs/2107.06917*. URL:  
558 <https://arxiv.org/abs/2107.06917>.

559 Wang, Yujia, Lu Lin, and Jinghui Chen (2022). “Communication-Efficient Adaptive Federated  
560 Learning”. In: *ICML*. Vol. 162. Proceedings of Machine Learning Research. PMLR, pp. 22802–  
561 22838.

562 Wei, Kang, Jun Li, Ming Ding, Chuan Ma, Howard H Yang, Farhad Farokhi, Shi Jin, Tony QS  
563 Quek, and H Vincent Poor (2020). “Federated learning with differential privacy: Algorithms and  
564 performance analysis”. In: *IEEE transactions on information forensics and security* 15, pp. 3454–  
565 3469.

566 Woodworth, Blake E., Kumar Kshitij Patel, and Nati Srebro (2020). “Minibatch vs Local SGD for  
567 Heterogeneous Distributed Learning”. In: *Advances in Neural Information Processing Systems 33:*  
568 *Annual Conference on Neural Information Processing Systems 2020, NeurIPS 2020, December*  
569 *6-12, 2020, virtual*. Ed. by Hugo Larochelle, Marc’Aurelio Ranzato, Raia Hadsell, Maria-Florina  
570 Balcan, and Hsuan-Tien Lin. URL: <https://proceedings.neurips.cc/paper/2020/hash/45713f6ff2041d3fdfae927b82488db8-Abstract.html>.

571 Woodworth, Blake E., Kumar Kshitij Patel, Sebastian U. Stich, Zhen Dai, Brian Bullins, H. Brendan  
572 McMahan, Ohad Shamir, and Nathan Srebro (2020). “Is Local SGD Better than Minibatch SGD?”  
573 In: *Proceedings of the 37th International Conference on Machine Learning, ICML 2020, 13-18*  
574 *July 2020, Virtual Event*. Vol. 119. Proceedings of Machine Learning Research. PMLR, pp. 10334–  
575 10343. URL: <http://proceedings.mlr.press/v119/woodworth20a.html>.

576 Yang, Yuning, Xiaohong Liu, Tianrun Gao, Xiaodong Xu, and Guangyu Wang (2024). “Sa-FedLora:  
577 Adaptive Parameter Allocation for Efficient Federated Learning With Lora Tuning”. In: *arXiv*  
578 *preprint abs/2405.09394*. URL: <https://arxiv.org/abs/2405.09394>.

579 Yun, Chulhee, Shashank Rajput, and Suvrit Sra (2022). “Minibatch vs Local SGD with Shuffling:  
580 Tight Convergence Bounds and Beyond”. In: *ICLR*. OpenReview.net.

581 Zhou, Pan, Hanshu Yan, Xiaotong Yuan, Jiashi Feng, and Shuicheng Yan (2021). “Towards Un-  
582 derstanding Why Lookahead Generalizes Better Than SGD and Beyond”. In: *Advances in*  
583 *Neural Information Processing Systems*. Ed. by M. Ranzato, A. Beygelzimer, Y. Dauphin,  
584 P.S. Liang, and J. Wortman Vaughan. Vol. 34. Curran Associates, Inc., pp. 27290–27304.  
585 URL: [https://proceedings.neurips.cc/paper\\_files/paper/2021/file/e53a0a2978c28872a4505bdb51db06dc-Paper.pdf](https://proceedings.neurips.cc/paper_files/paper/2021/file/e53a0a2978c28872a4505bdb51db06dc-Paper.pdf).

## NeurIPS Paper Checklist

### 1. Claims

Question: Do the main claims made in the abstract and introduction accurately reflect the paper's contributions and scope?

Answer: [\[Yes\]](#)

Justification: All theoretical claims made by the abstract are substantiated by corresponding theoretical results, and we report the results of the experiments as well.

Guidelines:

- The answer NA means that the abstract and introduction do not include the claims made in the paper.
- The abstract and/or introduction should clearly state the claims made, including the contributions made in the paper and important assumptions and limitations. A No or NA answer to this question will not be perceived well by the reviewers.
- The claims made should match theoretical and experimental results, and reflect how much the results can be expected to generalize to other settings.
- It is fine to include aspirational goals as motivation as long as it is clear that these goals are not attained by the paper.

### 2. Limitations

Question: Does the paper discuss the limitations of the work performed by the authors?

Answer: [\[Yes\]](#)

Justification: We discuss the limitations of our convergence results after each theorem.

Guidelines:

- The answer NA means that the paper has no limitation while the answer No means that the paper has limitations, but those are not discussed in the paper.
- The authors are encouraged to create a separate "Limitations" section in their paper.
- The paper should point out any strong assumptions and how robust the results are to violations of these assumptions (e.g., independence assumptions, noiseless settings, model well-specification, asymptotic approximations only holding locally). The authors should reflect on how these assumptions might be violated in practice and what the implications would be.
- The authors should reflect on the scope of the claims made, e.g., if the approach was only tested on a few datasets or with a few runs. In general, empirical results often depend on implicit assumptions, which should be articulated.
- The authors should reflect on the factors that influence the performance of the approach. For example, a facial recognition algorithm may perform poorly when image resolution is low or images are taken in low lighting. Or a speech-to-text system might not be used reliably to provide closed captions for online lectures because it fails to handle technical jargon.
- The authors should discuss the computational efficiency of the proposed algorithms and how they scale with dataset size.
- If applicable, the authors should discuss possible limitations of their approach to address problems of privacy and fairness.
- While the authors might fear that complete honesty about limitations might be used by reviewers as grounds for rejection, a worse outcome might be that reviewers discover limitations that aren't acknowledged in the paper. The authors should use their best judgment and recognize that individual actions in favor of transparency play an important role in developing norms that preserve the integrity of the community. Reviewers will be specifically instructed to not penalize honesty concerning limitations.

### 3. Theory assumptions and proofs

Question: For each theoretical result, does the paper provide the full set of assumptions and a complete (and correct) proof?

Answer: [\[Yes\]](#)



Justification: We include the complete proof in the supplementary and a proof sketch for the main theorem in the main paper.

Guidelines:

- The answer NA means that the paper does not include theoretical results.
- All the theorems, formulas, and proofs in the paper should be numbered and cross-referenced.
- All assumptions should be clearly stated or referenced in the statement of any theorems.
- The proofs can either appear in the main paper or the supplemental material, but if they appear in the supplemental material, the authors are encouraged to provide a short proof sketch to provide intuition.
- Inversely, any informal proof provided in the core of the paper should be complemented by formal proofs provided in appendix or supplemental material.
- Theorems and Lemmas that the proof relies upon should be properly referenced.

#### 4. Experimental result reproducibility

Question: Does the paper fully disclose all the information needed to reproduce the main experimental results of the paper to the extent that it affects the main claims and/or conclusions of the paper (regardless of whether the code and data are provided or not)?

Answer: [\[Yes\]](#)

Justification: We disclose the the data used, all details of the architecture used, and all optimizer hyperparameters.

Guidelines:

- The answer NA means that the paper does not include experiments.
- If the paper includes experiments, a No answer to this question will not be perceived well by the reviewers: Making the paper reproducible is important, regardless of whether the code and data are provided or not.
- If the contribution is a dataset and/or model, the authors should describe the steps taken to make their results reproducible or verifiable.
- Depending on the contribution, reproducibility can be accomplished in various ways. For example, if the contribution is a novel architecture, describing the architecture fully might suffice, or if the contribution is a specific model and empirical evaluation, it may be necessary to either make it possible for others to replicate the model with the same dataset, or provide access to the model. In general, releasing code and data is often one good way to accomplish this, but reproducibility can also be provided via detailed instructions for how to replicate the results, access to a hosted model (e.g., in the case of a large language model), releasing of a model checkpoint, or other means that are appropriate to the research performed.
- While NeurIPS does not require releasing code, the conference does require all submissions to provide some reasonable avenue for reproducibility, which may depend on the nature of the contribution. For example
  - (a) If the contribution is primarily a new algorithm, the paper should make it clear how to reproduce that algorithm.
  - (b) If the contribution is primarily a new model architecture, the paper should describe the architecture clearly and fully.
  - (c) If the contribution is a new model (e.g., a large language model), then there should either be a way to access this model for reproducing the results or a way to reproduce the model (e.g., with an open-source dataset or instructions for how to construct the dataset).
  - (d) We recognize that reproducibility may be tricky in some cases, in which case authors are welcome to describe the particular way they provide for reproducibility. In the case of closed-source models, it may be that access to the model is limited in some way (e.g., to registered users), but it should be possible for other researchers to have some path to reproducing or verifying the results.

#### 5. Open access to data and code

Question: Does the paper provide open access to the data and code, with sufficient instructions to faithfully reproduce the main experimental results, as described in supplemental material?

Answer: [No]

Justification: The datasets are openly available, and some of the training code will be shared. However, much of the training code is proprietary and won't be shared.

Guidelines:

- The answer NA means that paper does not include experiments requiring code.
- Please see the NeurIPS code and data submission guidelines (<https://nips.cc/public/guides/CodeSubmissionPolicy>) for more details.
- While we encourage the release of code and data, we understand that this might not be possible, so "No" is an acceptable answer. Papers cannot be rejected simply for not including code, unless this is central to the contribution (e.g., for a new open-source benchmark).
- The instructions should contain the exact command and environment needed to run to reproduce the results. See the NeurIPS code and data submission guidelines (<https://nips.cc/public/guides/CodeSubmissionPolicy>) for more details.
- The authors should provide instructions on data access and preparation, including how to access the raw data, preprocessed data, intermediate data, and generated data, etc.
- The authors should provide scripts to reproduce all experimental results for the new proposed method and baselines. If only a subset of experiments are reproducible, they should state which ones are omitted from the script and why.
- At submission time, to preserve anonymity, the authors should release anonymized versions (if applicable).
- Providing as much information as possible in supplemental material (appended to the paper) is recommended, but including URLs to data and code is permitted.

## 6. Experimental setting/details

Question: Does the paper specify all the training and test details (e.g., data splits, hyperparameters, how they were chosen, type of optimizer, etc.) necessary to understand the results?

Answer: [Yes]

Justification: See our response to the reproducibility question.

Guidelines:

- The answer NA means that the paper does not include experiments.
- The experimental setting should be presented in the core of the paper to a level of detail that is necessary to appreciate the results and make sense of them.
- The full details can be provided either with the code, in appendix, or as supplemental material.

## 7. Experiment statistical significance

Question: Does the paper report error bars suitably and correctly defined or other appropriate information about the statistical significance of the experiments?

Answer: [No]

Justification: Our experiments are conducted at large scale, involve extensive hyperparameter tuning, and replicating them many times for statistical significance would be too costly.

Guidelines:

- The answer NA means that the paper does not include experiments.
- The authors should answer "Yes" if the results are accompanied by error bars, confidence intervals, or statistical significance tests, at least for the experiments that support the main claims of the paper.
- The factors of variability that the error bars are capturing should be clearly stated (for example, train/test split, initialization, random drawing of some parameter, or overall run with given experimental conditions).

- The method for calculating the error bars should be explained (closed form formula, call to a library function, bootstrap, etc.)
- The assumptions made should be given (e.g., Normally distributed errors).
- It should be clear whether the error bar is the standard deviation or the standard error of the mean.
- It is OK to report 1-sigma error bars, but one should state it. The authors should preferably report a 2-sigma error bar than state that they have a 96% CI, if the hypothesis of Normality of errors is not verified.
- For asymmetric distributions, the authors should be careful not to show in tables or figures symmetric error bars that would yield results that are out of range (e.g. negative error rates).
- If error bars are reported in tables or plots, The authors should explain in the text how they were calculated and reference the corresponding figures or tables in the text.

## 8. Experiments compute resources

Question: For each experiment, does the paper provide sufficient information on the computer resources (type of compute workers, memory, time of execution) needed to reproduce the experiments?

Answer: [Yes]

Justification: We provide the details of the FLOP budget in the supplementary.

Guidelines:

- The answer NA means that the paper does not include experiments.
- The paper should indicate the type of compute workers CPU or GPU, internal cluster, or cloud provider, including relevant memory and storage.
- The paper should provide the amount of compute required for each of the individual experimental runs as well as estimate the total compute.
- The paper should disclose whether the full research project required more compute than the experiments reported in the paper (e.g., preliminary or failed experiments that didn't make it into the paper).

## 9. Code of ethics

Question: Does the research conducted in the paper conform, in every respect, with the NeurIPS Code of Ethics <https://neurips.cc/public/EthicsGuidelines>?

Answer: [Yes]

Justification: Our contribution is primarily theoretical and complies with the ethics guidelines.

Guidelines:

- The answer NA means that the authors have not reviewed the NeurIPS Code of Ethics.
- If the authors answer No, they should explain the special circumstances that require a deviation from the Code of Ethics.
- The authors should make sure to preserve anonymity (e.g., if there is a special consideration due to laws or regulations in their jurisdiction).

## 10. Broader impacts

Question: Does the paper discuss both potential positive societal impacts and negative societal impacts of the work performed?

Answer: [NA]

Justification: Our contribution is primarily theoretical and does not affect any societal applications directly.

Guidelines:

- The answer NA means that there is no societal impact of the work performed.
- If the authors answer NA or No, they should explain why their work has no societal impact or why the paper does not address societal impact.

- Examples of negative societal impacts include potential malicious or unintended uses (e.g., disinformation, generating fake profiles, surveillance), fairness considerations (e.g., deployment of technologies that could make decisions that unfairly impact specific groups), privacy considerations, and security considerations.
- The conference expects that many papers will be foundational research and not tied to particular applications, let alone deployments. However, if there is a direct path to any negative applications, the authors should point it out. For example, it is legitimate to point out that an improvement in the quality of generative models could be used to generate deepfakes for disinformation. On the other hand, it is not needed to point out that a generic algorithm for optimizing neural networks could enable people to train models that generate Deepfakes faster.
- The authors should consider possible harms that could arise when the technology is being used as intended and functioning correctly, harms that could arise when the technology is being used as intended but gives incorrect results, and harms following from (intentional or unintentional) misuse of the technology.
- If there are negative societal impacts, the authors could also discuss possible mitigation strategies (e.g., gated release of models, providing defenses in addition to attacks, mechanisms for monitoring misuse, mechanisms to monitor how a system learns from feedback over time, improving the efficiency and accessibility of ML).

## 11. Safeguards

Question: Does the paper describe safeguards that have been put in place for responsible release of data or models that have a high risk for misuse (e.g., pretrained language models, image generators, or scraped datasets)?

Answer: [NA]

Justification: NA.

Guidelines:

- The answer NA means that the paper poses no such risks.
- Released models that have a high risk for misuse or dual-use should be released with necessary safeguards to allow for controlled use of the model, for example by requiring that users adhere to usage guidelines or restrictions to access the model or implementing safety filters.
- Datasets that have been scraped from the Internet could pose safety risks. The authors should describe how they avoided releasing unsafe images.
- We recognize that providing effective safeguards is challenging, and many papers do not require this, but we encourage authors to take this into account and make a best faith effort.

## 12. Licenses for existing assets

Question: Are the creators or original owners of assets (e.g., code, data, models), used in the paper, properly credited and are the license and terms of use explicitly mentioned and properly respected?

Answer: [Yes]

Justification: The training data are the publicly available C4 and CIFAR-10 datasets.

Guidelines:

- The answer NA means that the paper does not use existing assets.
- The authors should cite the original paper that produced the code package or dataset.
- The authors should state which version of the asset is used and, if possible, include a URL.
- The name of the license (e.g., CC-BY 4.0) should be included for each asset.
- For scraped data from a particular source (e.g., website), the copyright and terms of service of that source should be provided.
- If assets are released, the license, copyright information, and terms of use in the package should be provided. For popular datasets, [paperswithcode.com/datasets](https://paperswithcode.com/datasets) has curated licenses for some datasets. Their licensing guide can help determine the license of a dataset.

- For existing datasets that are re-packaged, both the original license and the license of the derived asset (if it has changed) should be provided.
- If this information is not available online, the authors are encouraged to reach out to the asset's creators.

### 13. New assets

Question: Are new assets introduced in the paper well documented and is the documentation provided alongside the assets?

Answer: [NA]

Justification: no new assets.

Guidelines:

- The answer NA means that the paper does not release new assets.
- Researchers should communicate the details of the dataset/code/model as part of their submissions via structured templates. This includes details about training, license, limitations, etc.
- The paper should discuss whether and how consent was obtained from people whose asset is used.
- At submission time, remember to anonymize your assets (if applicable). You can either create an anonymized URL or include an anonymized zip file.

### 14. Crowdsourcing and research with human subjects

Question: For crowdsourcing experiments and research with human subjects, does the paper include the full text of instructions given to participants and screenshots, if applicable, as well as details about compensation (if any)?

Answer: [NA]

Justification: No crowdsourced experiments or human subjects.

Guidelines:

- The answer NA means that the paper does not involve crowdsourcing nor research with human subjects.
- Including this information in the supplemental material is fine, but if the main contribution of the paper involves human subjects, then as much detail as possible should be included in the main paper.
- According to the NeurIPS Code of Ethics, workers involved in data collection, curation, or other labor should be paid at least the minimum wage in the country of the data collector.

### 15. Institutional review board (IRB) approvals or equivalent for research with human subjects

Question: Does the paper describe potential risks incurred by study participants, whether such risks were disclosed to the subjects, and whether Institutional Review Board (IRB) approvals (or an equivalent approval/review based on the requirements of your country or institution) were obtained?

Answer: [NA]

Justification: No crowdsourced experiments or human subjects.

Guidelines:

- The answer NA means that the paper does not involve crowdsourcing nor research with human subjects.
- Depending on the country in which research is conducted, IRB approval (or equivalent) may be required for any human subjects research. If you obtained IRB approval, you should clearly state this in the paper.
- We recognize that the procedures for this may vary significantly between institutions and locations, and we expect authors to adhere to the NeurIPS Code of Ethics and the guidelines for their institution.
- For initial submissions, do not include any information that would break anonymity (if applicable), such as the institution conducting the review.

902       **16. Declaration of LLM usage**  
903       Question: Does the paper describe the usage of LLMs if it is an important, original, or  
904       non-standard component of the core methods in this research? Note that if the LLM is used  
905       only for writing, editing, or formatting purposes and does not impact the core methodology,  
906       scientific rigorousness, or originality of the research, declaration is not required.  
907       Answer: [No]  
908       Justification: We did not use LLMs for any core component in this research.  
909       Guidelines:  
910       • The answer NA means that the core method development in this research does not  
911       involve LLMs as any important, original, or non-standard components.  
912       • Please refer to our LLM policy (<https://neurips.cc/Conferences/2025/LLM>)  
913       for what should or should not be described.



# Supplementary material

## A Supplementary experimental details

In this section we provide the details on the language model pretraining experiments discussed in the main text.

### A.1 Language model pretraining

We study the impact of using various outer optimizers on large language model pretraining. We utilized Chinchilla-style decoder transformer architectures (Hoffmann et al., 2022) trained on the C4 dataset (Raffel et al., 2020), consistent with common practices in large-scale model training (Douillard, Feng, Rusu, Chhaparia, et al., 2023). The following subsections detail the specific hyperparameters, variations in training configurations (such as the number of inner steps and replicas/clients), and analyses of optimizer behavior, including learning rate scheduling and observed gradient cosine similarities.

#### A.1.1 Hyperparameters details

We show in Table 1 the hyperparameters considered and kept, and in Table 2 the architectural hyperparameters. We tuned all our optimizers on a separate validation set. We also considered using the Schedule-Free Optimizer with Nesterov acceleration on top but it was hard to tune and unstable.

Table 2: **Model Configuration** for the three evaluated sizes. All are based on the transformer architecture, chinchilla-style (Hoffmann et al., 2022).

| Hyperparameter   | 150M   | 400M | 1B   |
|------------------|--------|------|------|
| Number of layers | 12     | 12   | 24   |
| Hidden dim       | 896    | 1536 | 2048 |
| Number of heads  | 16     | 12   | 16   |
| K/V size         | 64     | 128  | 128  |
| Vocab size       | 32,000 |      |      |

#### A.1.2 Varying inner steps

In Figure 3, we compare the stability of different outer optimizers when varying the synchronization frequency. We experiments a different amount of inner steps, from 50, to 2000. All experiments are run in pretraining from scratch, with 150 millions (150M) parameters. We note that as the synchronization frequency decreases (number of inner/local steps increases), performance decreases. Notably, averaging (in orange), is relatively constant w.r.t the synchronization frequency: its performance stay stable from  $H = 250$  to  $H = 2000$ . On the other hand, using Nesterov with high outer learning rate (in light green) is particularly unstable, its performance decreases by 10.7%, this indicates that the learning rate should be tuned alongside the synchronization frequency. On the hand, SF-SGD (in blue) has minimal degradation of performance (4.2%), highlighting the *schedule-free* property when varying hyperparameters.

#### A.1.3 Varying replicas / flops budget

When increasing the number of distributed replicas, two options are possible: (a) Keeping the local per-replica batch size constant and thus increasing global batch size and flops budget, and (b) Keeping the global batch size/flops budget constant and thus reducing the local per-replica batch size.

We present in Figure 4 results of the first option with x-axis the flops budget for a single model size (150M). It is worth noting that increasing the number of replicas improves the performance of Nesterov (in green) and SF-SGD (in blue) but the gain quickly plateau. On the other hand, increasing the batch size for data-parallel (at the cost of more communication, because more DP replicas) or the number of steps (at the cost of longer training) still rapidly improves perplexity. Therefore, we

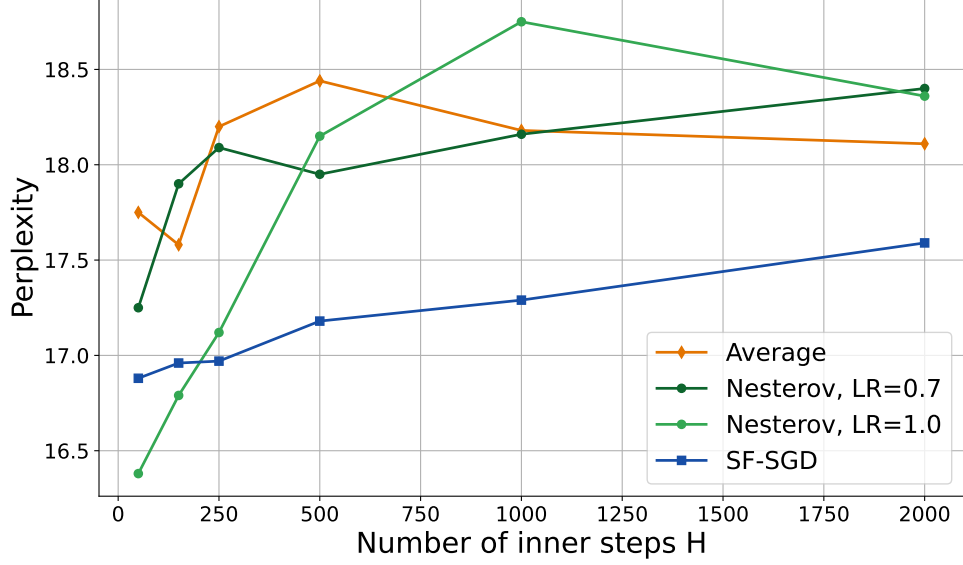

Figure 3: **Varying the communication frequency**, i.e. number of inner steps  $H$ , when pretraining from scratch at 150M parameters.

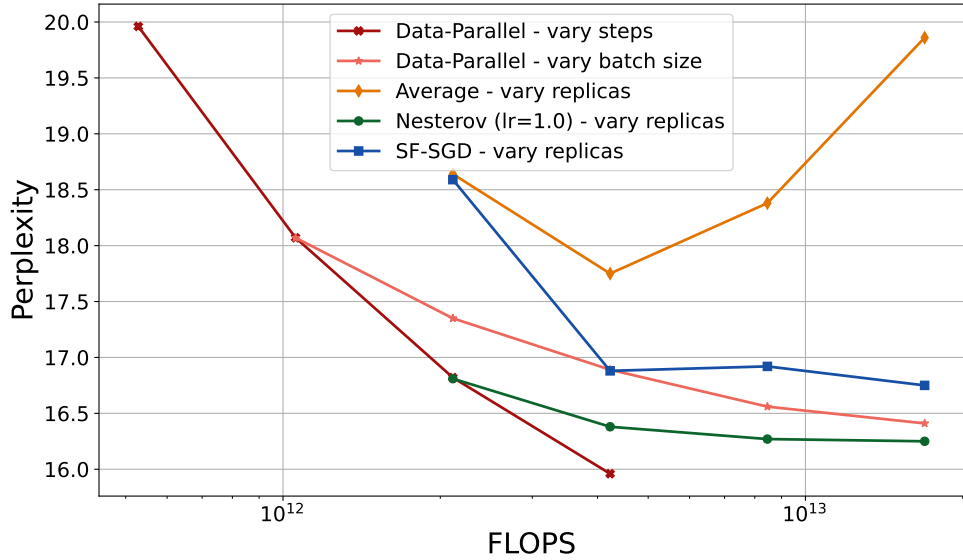

Figure 4: **Pareto front** of the flops vs perplexity, comparing various approach scaling the flops budget: increasing the number of steps, increasing the batch size in data-parallel, and increasing the number of replicas for federated learning.

950 wish to highlight here a disadvantage of federated learning methods seldom mentioned: while those  
 951 methods are extremely communication-efficient, and can be made flops-efficient, their flops-efficiency  
 952 disappear as the number of replicas increases.

953 To this problem, several hypotheses could be raised, such as the decreasing cosine similarity between  
 954 outer gradients as the number of replicas increase, even when using an *i.i.d.* data split across replicas.  
 955 In Figure 5, we report the average similarity across a whole training for different number of replicas.  
 956 For momentum-based methods (Nesterov, SF-SGD), the similarity decreases from 30% at  $M = 2$   
 957 replicas to 10% at  $M = 16$  replicas. Full details across training steps can be found in the appendix.

958 Finally, note that we didn't investigate further the second option of keeping the global batch size/flops  
 959 budget constant and thus reducing the local per-replica batch size. We found that dividing the batch  
 960 size by the number of replicas leads quickly to a local per-replica batch size that is critically low, and  
 961 further reduces the flops-efficiency. More investigations should be pushed in that direction.

#### 962 A.1.4 Schedule-free but not tuning-free

963 The schedule-free method of Defazio et al., 2024 enables not doing any learning rate scheduling,  
 964 greatly simplifying training configuration. However, it doesn't mean it is hyperparameters-tuning-free.  
 965 Indeed, we found out that we had to extensively tune the initial learning rate (to 2.0), remove learning  
 966 rate warm-up contrarily to what is advised, and use a particularly low  $b1$  decay: 0.2, as illustrated in  
 967 Figure 6.

#### 968 A.1.5 Pretraining: outer learning rate scheduling

969 Schedule-free SGD enables not having to manually scheduling the outer learning rate. Therefore,  
 970 we wondered if we could improve the SotA federated learning baseline, DiLoCo (Nesterov outer  
 971 optimizer), with an outer learning rate schedule. We investigate in Figure 7 three schedules: *constant*  
 972 as in (Douillard, Feng, Rusu, Chhaparia, et al., 2023), *cosine decay*, and *linear after a plateau*. For  
 973 the latter we consider a constant plateau for 10% and 25% of the total steps. For each method, we  
 974 also tuned the peak outer learning rate. We don't use any warm-up in the outer optimization as we  
 975 always found it to be harmful.

976 We find that constant outer learning rate is the best performing schedule. It's unclear how the other  
 977 schedules are interacting with the inner learning rate scheduling. A possible solution, not investigated  
 978 in this report, would be to increase the number of inner steps  $H$  as the inner learning rate decreases  
 979 (Gu, Lyu, Arora, et al., 2024).

#### 980 A.1.6 Cosine similarity between outer gradients

981 We display the cosine similarity between outer gradients, across scales (150M, 400M, and 1B) in  
 982 Figure 8, and across replicas (for 150M, from 2 to 16 replicas) in Figure 9. The solid line represent  
 983 the mean, and the shaded area the standard deviation. We normalize the x-axis as a percentage of the  
 984 training in order to compare models which have done different amount of steps (e.g. 24,000 steps for  
 985 150M vs 30,000 for 400M).

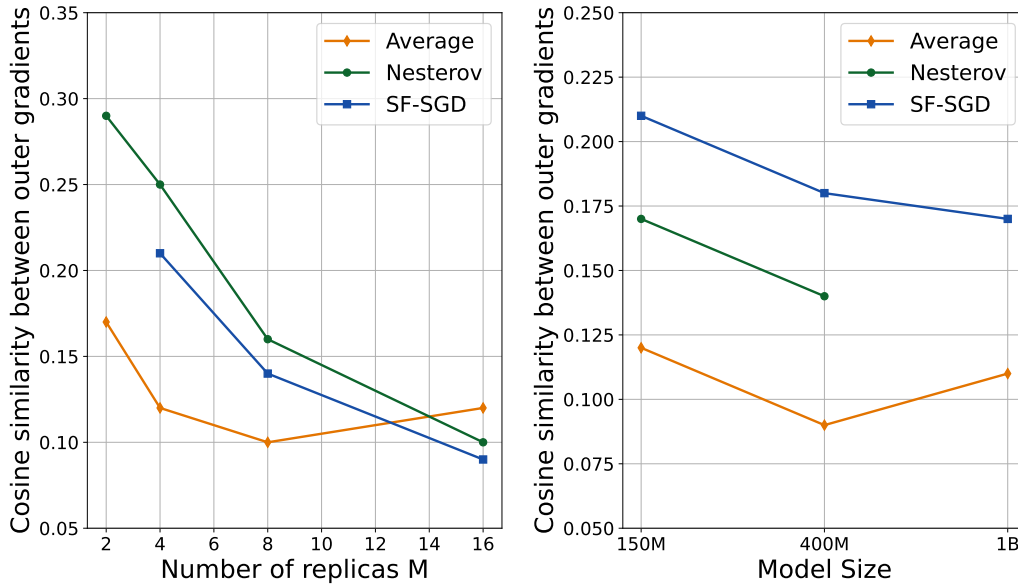

Figure 5: **Cosine similarity** between outer gradients across different number of replicas (*left*) and model scales (*right*). We average the similarity across the middle 50% of the training.

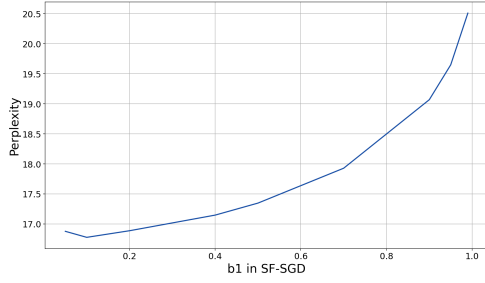

Figure 6: **Tuning  $b_1$  decay** has a major impact on performance, and its value must be very low.

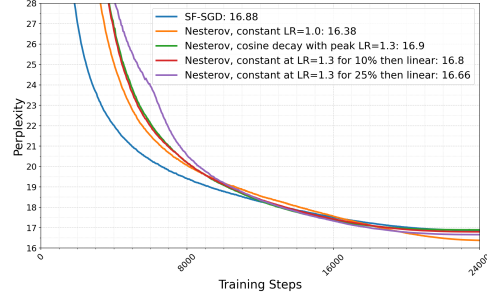

Figure 7: Which outer **learning rate schedule** to use?

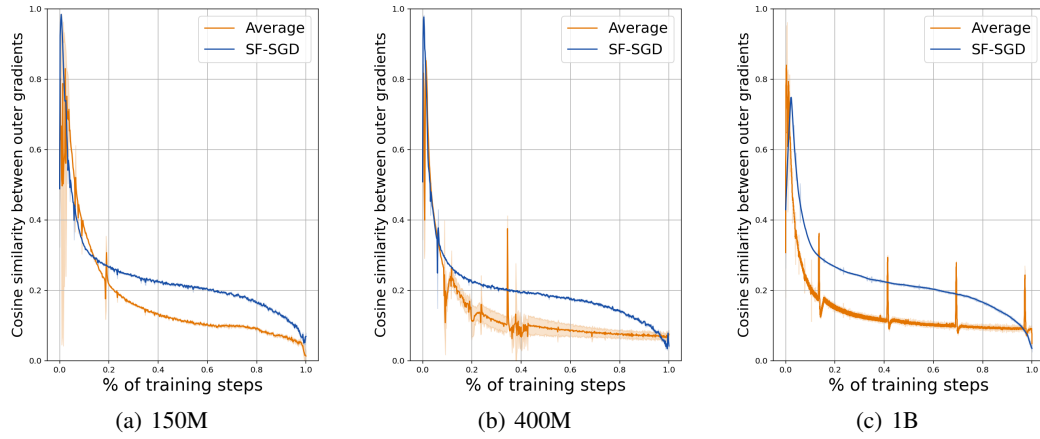

Figure 8: **Similarity** between outer gradients across steps and scales.

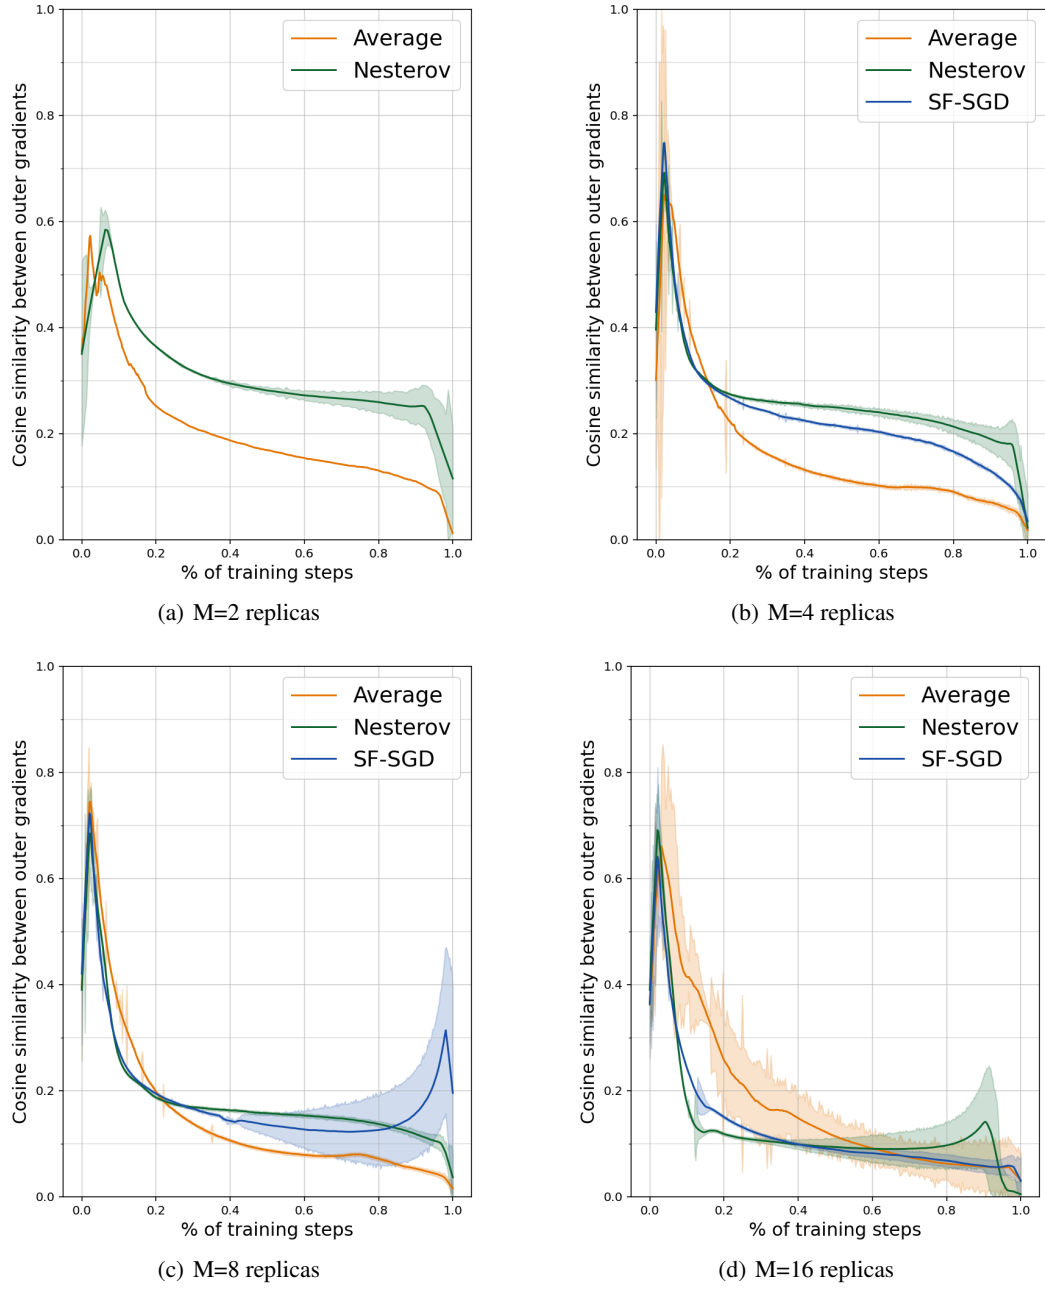

Figure 9: **Cosine similarity** between outer gradients across steps and number of replicas.

# Theory

## B Guarantees for Local SGD

First, we recall our setting and define some notation. We consider the problem of minimizing a function  $f$  in a distributed setting with  $M$  workers performing Local SGD. Let  $x_r$  denote the global model parameters at the beginning of round  $r$ . Each worker  $m$  initializes its local parameters as  $y_{m,r,0} = x_r$  and performs  $H$  local SGD steps according to

$$y_{m,r,h+1} = y_{m,r,h} - \eta g_{m,r,h},$$

where  $g_{m,r,h} = \nabla f(y_{m,r,h}) + n_{m,r,h}$  is the stochastic gradient with noise  $n_{m,r,h}$ , and  $\bar{g}_{m,r,h} = \nabla f(y_{m,r,h})$  is the true gradient. By Assumption 3.2 we have  $\mathbb{E}[g_{m,r,h}] = \bar{g}_{m,r,h}$ . After  $H$  local steps, the global model update can be equivalently written as  $x_{r+1} = x_r - \gamma \eta \sum_{h=0}^{H-1} g_{r,h}$  where  $g_{r,h} = \frac{1}{M} \sum_{m=1}^M g_{m,r,h}$  is the average gradient across workers and  $y_{r,h} = \frac{1}{M} \sum_{m=1}^M y_{m,r,h}$  is the average model. Note that these two last sequences are virtual sequences and not actually computed. We also define  $x_{r,h} = x_r - \gamma \eta \sum_{h=0}^{H-1} g_{r,h}$  as an intermediate quantity used in the analysis.

### B.1 Algorithm-independent results

**Lemma B.1.** (Karimireddy et al., 2020, Lemma 6) *Let  $f$  be a convex and  $L$ -smooth function. Suppose that  $\eta \leq \frac{2}{L}$ , let  $T_\eta(x) = x - \eta \nabla f(x)$ . Then*

$$\|T_\eta(x) - T_\eta(y)\|^2 \leq \|x - y\|^2.$$

*Proof.* The proof is provided for completeness only. We have

$$\|T_\eta(x) - T_\eta(y)\|^2 = \|x - y\|^2 + \eta^2 \|\nabla f(x) - \nabla f(y)\|^2 - 2\eta \langle x - y, \nabla f(x) - \nabla f(y) \rangle. \quad (8)$$

By the Baillon-Haddad theorem (Bauschke and Combettes, 2009) we have

$$\langle x - y, \nabla f(x) - \nabla f(y) \rangle \geq \frac{1}{L} \|\nabla f(x) - \nabla f(y)\|^2.$$

Using this in Equation (8) gives

$$\|T_\eta(x) - T_\eta(y)\|^2 \leq \|x - y\|^2 - \eta \left( \frac{2}{L} - \eta \right) \|\nabla f(x) - \nabla f(y)\|^2.$$

If  $\eta \leq \frac{1}{L}$  then  $\frac{2}{L} - \eta \geq 0$  and therefore  $\|T_\eta(x) - T_\eta(y)\|^2 \leq \|x - y\|^2$ .  $\square$

**Lemma B.2.** *Let  $y_1, \dots, y_n$  be real numbers. Then,*

$$\frac{1}{n} \sum_{k=1}^n |y_i| \leq \sqrt{\frac{1}{n} \sum_{k=1}^n y_i^2}.$$

*Proof.* This is just the arithmetic mean-root mean square inequality and we include the proof solely for completeness. Let  $Y$  be a random variable that takes the value  $y_i^2$  with probability  $\frac{1}{n}$ , and let  $g(x) = \sqrt{x}$ . Observe that

$$\frac{1}{n} \sum_{k=1}^n |y_i| = \mathbb{E}[g(Y)].$$

Since  $g$  is a concave function, by Jensen's inequality we have that  $\mathbb{E}[g(Y)] \leq g(\mathbb{E}[Y])$ . Therefore,

$$\frac{1}{n} \sum_{k=1}^n |y_i| = \mathbb{E}[g(Y)] \leq g(\mathbb{E}[Y]) = \sqrt{\frac{1}{n} \sum_{k=1}^n y_i^2}.$$

1006  $\square$



1007 **Lemma B.3.** (Variance of Sum of Conditionally Independent Random Variables). Let  $Z_1, \dots, Z_n$  be  
 1008 random variables such that  $Z_i$  satisfies

$$\mathbb{E}_{i-1}[Z_i] = 0, \quad \text{and}, \quad \mathbb{E}[\|Z_i\|^2] = \sigma_i^2,$$

1009 where  $\mathbb{E}_i[\cdot]$  denotes expectation conditional on  $Z_1, Z_2, \dots, Z_i$ . Then,

$$\mathbb{E}\left[\left\|\sum_{i=1}^n Z_i\right\|^2\right] = \sum_{i=1}^n \sigma_i^2.$$

*Proof.*

$$\begin{aligned} \mathbb{E}\left[\left\|\sum_{i=1}^n Z_i\right\|^2\right] &= \mathbb{E}\left[\mathbb{E}_{n-1}\left[\left\|\sum_{i=1}^n Z_i\right\|^2\right]\right] \\ &= \mathbb{E}\left[\mathbb{E}_{n-1}\left[\left\|\sum_{i=1}^{n-1} Z_i\right\|^2 + \|Z_n\|^2 + 2\left\langle\sum_{i=1}^{n-1} Z_i, Z_n\right\rangle\right]\right] \\ &= \mathbb{E}\left[\mathbb{E}_{n-1}\left[\left\|\sum_{i=1}^{n-1} Z_i\right\|^2\right] + \sigma_n^2\right]. \end{aligned}$$

1010 The cross-term  $\mathbb{E}_{n-1}\left[2\left\langle\sum_{i=1}^{n-1} Z_i, Z_n\right\rangle\right]$  vanishes because  $\mathbb{E}_{n-1}[Z_n] = 0$  and  $\sum_{i=1}^{n-1} Z_i$  is mea-  
 1011 surable with respect to the sigma-algebra generated by  $Z_1, \dots, Z_{n-1}$ . Continuing,

$$\mathbb{E}\left[\left\|\sum_{i=1}^n Z_i\right\|^2\right] = \mathbb{E}\left[\left\|\sum_{i=1}^{n-1} Z_i\right\|^2\right] + \sigma_n^2.$$

1012 Recursing we get,

$$\mathbb{E}\left[\left\|\sum_{i=1}^n Z_i\right\|^2\right] = \sum_{i=1}^n \sigma_i^2.$$

1013 This completes the proof.  $\square$

1014 **Lemma B.4.** (Ivgyi, Hinder, and Carmon, 2023, Lemma 7). Let  $S$  be the set of nonnegative and  
 1015 nondecreasing sequences. Let  $y_1, y_2, \dots$  be a sequence in  $S$ . Let  $C_t \in \mathcal{F}_{t-1}$  for all  $t = 1, 2, \dots, T$   
 1016 and let  $X_t$  be a martingale difference sequence adapted to  $\mathcal{F}_t$  such that  $|X_t| \leq C_t$  with probability 1  
 1017 for  $t = 1, 2, \dots, T$ . Then for all  $\delta \in (0, 1)$  and  $\hat{X}_t \in \mathcal{F}_{t-1}$  such that  $|\hat{X}_t| \leq C_t$  with probability 1,  
 1018 we have that with probability at least  $1 - \delta - \text{Prob}(\exists t \leq T \mid C_t > c)$  that for all  $c > 0$

$$\left|\sum_{i=1}^t y_i X_i\right| \leq 8y_t \sqrt{\theta_{t,\delta} \sum_{i=1}^t (X_i - \hat{X}_i)^2 + c^2 \theta_{t,\delta}^2},$$

1019 where  $\theta_{t,\delta} = \log \frac{60 \log 6t}{\delta}$ .

1020 **Lemma B.5.** Suppose we have

$$r_{k+1} \leq (1+a)r_k - b\delta_k + c$$

1021 Then,

$$\min_j \delta_j \leq \frac{r_0 e^{aK}}{bK} + \frac{c}{b}.$$

1022 *Proof.* Let  $w_{k+1} = \frac{w_k}{1+a}$ . We have

$$\begin{aligned} w_{k+1}r_{k+1} &\leq (1+a)w_{k+1}r_k - bw_{k+1}\delta_k + cw_{k+1} \\ &= w_k r_k - bw_{k+1}\delta_k + cw_{k+1}. \end{aligned}$$

1023 Telescoping,

$$w_K r_K \leq w_0 r_0 - b \sum_{j=0}^{K-1} w_{j+1} \delta_j + c \sum_{j=0}^{K-1} w_{j+1}.$$

1024 Rearranging,

$$\frac{1}{\sum_{j=0}^{K-1} w_{j+1}} \sum_{j=0}^{K-1} w_{j+1} \delta_j \leq \frac{w_0 r_0}{b \sum_{j=0}^{K-1} w_{j+1}} + \frac{c}{b}.$$

1025 We have  $w_k = \frac{w_{k-1}}{1+a} = \frac{w_0}{(1+a)^k}$ . Therefore,

$$\begin{aligned} \sum_{j=0}^{K-1} w_{j+1} &= \sum_{j=0}^{K-1} \frac{w_0}{(1+a)^{j+1}} \\ &\geq \sum_{j=0}^{K-1} \frac{w_0}{(1+a)^K} \\ &= \frac{w_0 K}{(1+a)^K}. \end{aligned}$$

1026 Therefore,

$$\frac{1}{\sum_{j=0}^{K-1} w_{j+1}} \sum_{j=0}^{K-1} w_{j+1} \delta_j \leq \frac{r_0 (1+a)^K}{bK} + \frac{c}{b}.$$

1027 Finally, it remains to use that  $1+a \leq e^a$ . □

## 1028 B.2 Non-adaptive guarantee without momentum

1029 We begin with a lemma that establishes the regret of the local optimizer. Often the regret is measured  
1030 against the optimal point (like  $x_*$ ) but here we instead utilize it against the *initial* point  $y_{r,0} = x_r$ .

1031 **Lemma B.6** (Regret against starting point). *For any learning rate  $\eta > 0$ , the inner product between*  
1032 *the displacement from the initial average iterate and the average gradient satisfies,*

$$\sum_{h=0}^{H-1} \langle y_{r,h} - y_{r,0}, g_{r,h} \rangle \leq \frac{\eta}{2} \sum_{h=0}^{H-1} \|g_{r,h}\|^2 - \frac{1}{2\eta} \|y_{r,H} - y_{r,0}\|^2.$$

1033 *Proof.* We begin by using that  $y_{r,h+1} = y_{r,h} - \eta g_{r,h}$  and expanding the square as

$$\begin{aligned} \|y_{r,h+1} - y_{r,0}\|^2 &= \|y_{r,h} - \eta g_{r,h} - y_{r,0}\|^2 \\ &= \|y_{r,h} - y_{r,0}\|^2 + \eta^2 \|g_{r,h}\|^2 - 2\eta \langle y_{r,h} - y_{r,0}, g_{r,h} \rangle. \end{aligned}$$

1034 Rearranging to isolate the inner product term, we obtain

$$\langle y_{r,h} - y_{r,0}, g_{r,h} \rangle = \frac{\|y_{r,h} - y_{r,0}\|^2 - \|y_{r,h+1} - y_{r,0}\|^2}{2\eta} + \frac{\eta}{2} \|g_{r,h}\|^2.$$

1035 Summing over  $h$  from 0 to  $H-1$ ,

$$\begin{aligned} \sum_{h=0}^{H-1} \langle y_{r,h} - y_{r,0}, g_{r,h} \rangle &= \sum_{h=0}^{H-1} \left( \frac{\|y_{r,h} - y_{r,0}\|^2 - \|y_{r,h+1} - y_{r,0}\|^2}{2\eta} + \frac{\eta}{2} \|g_{r,h}\|^2 \right) \\ &= \frac{1}{2\eta} \sum_{h=0}^{H-1} (\|y_{r,h} - y_{r,0}\|^2 - \|y_{r,h+1} - y_{r,0}\|^2) + \frac{\eta}{2} \sum_{h=0}^{H-1} \|g_{r,h}\|^2. \end{aligned}$$

1036 The first sum telescopes

$$\begin{aligned} \sum_{h=0}^{H-1} (\|y_{r,h} - y_{r,0}\|^2 - \|y_{r,h+1} - y_{r,0}\|^2) &= \|y_{r,0} - y_{r,0}\|^2 - \|y_{r,H} - y_{r,0}\|^2 \\ &= -\|y_{r,H} - y_{r,0}\|^2. \end{aligned}$$

1037 Therefore,

$$\begin{aligned} \sum_{h=0}^{H-1} \langle y_{r,h} - y_{r,0}, g_{r,h} \rangle &= -\frac{\|y_{r,H} - y_{r,0}\|^2}{2\eta} + \frac{\eta}{2} \sum_{h=0}^{H-1} \|g_{r,h}\|^2 \\ &\leq \frac{\eta}{2} \sum_{h=0}^{H-1} \|g_{r,h}\|^2 - \frac{\|y_{r,H} - y_{r,0}\|^2}{2\eta}. \end{aligned}$$

1038 □

1039 **Lemma B.7.** (Local client drift bound). Suppose that Assumptions 3.1 and 3.2 hold. Then in  
1040 Algorithm GEN-LOC-SGD for all  $r$  and  $h$ , if  $\eta \leq \frac{1}{L}$ , then

$$\mathbb{E} \left[ \frac{1}{M^2} \sum_{m,s=1}^M \|y_{m,r,h} - y_{s,r,h}\|^2 \right] \leq 2\eta^2 \sigma^2 h.$$

1041 *Proof.* Let  $\tilde{T}_\eta(y_{m,r,h}) = y_{m,r,h} - \eta g_{m,r,h}$  where  $g_{m,r,h}$  is the stochastic gradient, and  $T_\eta(y_{m,r,h}) =$   
1042  $y - \eta \bar{g}_{m,r,h}$  is the corresponding expected gradient update. We have

$$\begin{aligned} y_{m,r,h+1} - y_{s,r,h+1} &= \tilde{T}_\eta(y_{m,r,h}) - \tilde{T}_\eta(y_{s,r,h}) \\ &= T_\eta(y_{m,r,h}) - T_\eta(y_{s,r,h}) + [\tilde{T}_\eta(y_{m,r,h}) - \tilde{T}_\eta(y_{s,r,h}) - (T_\eta(y_{m,r,h}) - T_\eta(y_{s,r,h}))] \\ &= T_\eta(y_{m,r,h}) - T_\eta(y_{s,r,h}) + [\xi_{m,r,h} - \xi_{s,r,h}], \end{aligned}$$

1043 where  $\xi_{m,r,h} = \tilde{T}_\eta(y_{m,r,h}) - T_\eta(y_{m,r,h}) = -\eta n_{m,r,h}$  is the noise term. Define  $\mathcal{V}_{r,h} =$   
1044  $\frac{1}{M^2} \sum_{m,s=1}^M \|y_{m,r,h} - y_{s,r,h}\|^2$ . It follows that

$$\begin{aligned} \mathcal{V}_{r,h+1} &= \frac{1}{M^2} \sum_{m,s=1}^M \|y_{m,r,h+1} - y_{s,r,h+1}\|^2 \\ &= \frac{1}{M^2} \sum_{m,s=1}^M \left[ \|T_\eta(y_{m,r,h}) - T_\eta(y_{s,r,h})\|^2 + \|\xi_{m,r,h} - \xi_{s,r,h}\|^2 \right. \\ &\quad \left. + 2 \langle T_\eta(y_{m,r,h}) - T_\eta(y_{s,r,h}), \xi_{m,r,h} - \xi_{s,r,h} \rangle \right]. \end{aligned}$$

1045 Taking conditional expectation gives

$$\mathbb{E}_{r,h} [\mathcal{V}_{r,h+1}] = \frac{1}{M^2} \sum_{m,s=1}^M \left[ \|T_\eta(y_{m,r,h}) - T_\eta(y_{s,r,h})\|^2 + \mathbb{E}_h [\|\xi_{m,r,h} - \xi_{s,r,h}\|^2] \right].$$

1046 Finally, using the fact that  $\|T_\eta(x) - T_\eta(y)\|^2 \leq \|x - y\|^2$  whenever  $\eta \leq \frac{2}{L}$  (Lemma B.1) and  
1047 Assumption 3.2, we get

$$\begin{aligned} \mathbb{E}_{r,h} [\mathcal{V}_{r,h+1}] &\leq \frac{1}{M^2} \sum_{m,s=1}^M \left[ \|y_{m,r,h} - y_{s,r,h}\|^2 + 2\eta^2 \sigma^2 \right] \\ &= \mathcal{V}_{r,h} + 2\eta^2 \sigma^2. \end{aligned}$$

1048 Therefore by taking unconditional expectation and recursing from  $h = 0$  where all local iterates are  
1049 equal to  $x_r$  (so  $\mathcal{V}_{r,0} = 0$ ), we get  $\mathbb{E} [\mathcal{V}_{r,h}] \leq 2\eta^2 \sigma^2 h$ . □

1050 *Proof of Theorem 3.3.* We begin by analyzing how the squared distance to the optimal solution  
 1051 changes after one round of communication. From the update rule, we have,

$$\|x_{r+1} - x_*\|^2 = \|x_r - x_*\|^2 - 2\eta\gamma \sum_{h=0}^{H-1} \langle x_r - x_*, g_{r,h} \rangle + \eta^2\gamma^2 \left\| \sum_{h=0}^{H-1} g_{r,h} \right\|^2. \quad (9)$$

1052 We rewrite the inner product term as

$$\begin{aligned} -\langle x_r - x_*, g_{r,h} \rangle &= \langle x_* - x_r, g_{r,h} \rangle \\ &= \langle x_* - y_{r,h}, g_{r,h} \rangle + \langle y_{r,h} - x_r, g_{r,h} \rangle. \end{aligned}$$

1053 Summing over all local steps we obtain

$$-\sum_{h=0}^{H-1} \langle x_r - x_*, g_{r,h} \rangle = \sum_{h=0}^{H-1} \langle x_* - y_{r,h}, g_{r,h} \rangle + \sum_{h=0}^{H-1} \langle y_{r,h} - x_r, g_{r,h} \rangle.$$

1054 Applying Lemma B.6 we get

$$-\sum_{h=0}^{H-1} \langle x_r - x_*, g_{r,h} \rangle = \sum_{h=0}^{H-1} \langle x_* - y_{r,h}, g_{r,h} \rangle - \frac{\|y_{r,H} - y_{r,0}\|^2}{2\eta} + \frac{\eta}{2} \sum_{h=0}^{H-1} \|g_{r,h}\|^2. \quad (10)$$

1055 Observe that since  $y_{r,H} - y_{r,0} = -\eta \sum_{h=0}^{H-1} g_{r,h}$ , Equation (10) becomes,

$$-\sum_{h=0}^{H-1} \langle x_r - x_*, g_{r,h} \rangle = \sum_{h=0}^{H-1} \langle x_* - y_{r,h}, g_{r,h} \rangle - \frac{\eta}{2} \left\| \sum_{h=0}^{H-1} g_{r,h} \right\|^2 + \frac{\eta}{2} \sum_{h=0}^{H-1} \|g_{r,h}\|^2.$$

1056 Plugging this back into Equation (9),

$$\begin{aligned} \|x_{r+1} - x_*\|^2 &\leq \|x_r - x_*\|^2 + 2\eta\gamma \sum_{h=0}^{H-1} \langle x_* - y_{r,h}, g_{r,h} \rangle \\ &\quad + \gamma\eta^2 \sum_{h=0}^{H-1} \|g_{r,h}\|^2 + \eta^2\gamma(\gamma - 1) \left\| \sum_{h=0}^{H-1} g_{r,h} \right\|^2. \end{aligned}$$

1057 Let us take expectation conditional on  $x_1, \dots, x_r$ ,

$$\begin{aligned} \mathbb{E}_r \left[ \|x_{r+1} - x_*\|^2 \right] &\leq \|x_r - x_*\|^2 + 2\eta\gamma \sum_{h=0}^{H-1} \mathbb{E}_r [\langle x_* - y_{r,h}, g_{r,h} \rangle] \\ &\quad + \gamma\eta^2 \sum_{h=0}^{H-1} \mathbb{E}_r [\|g_{r,h}\|^2] + \eta^2\gamma(\gamma - 1) \mathbb{E}_r \left[ \left\| \sum_{h=0}^{H-1} g_{r,h} \right\|^2 \right]. \end{aligned} \quad (11)$$

1058 For the squared norm of the average gradient:

$$\begin{aligned} \mathbb{E}_r [\|g_{r,h}\|^2] &= \mathbb{E}_r [\mathbb{E}_{r,h-1} [\|g_{r,h}\|^2]] \\ &= \mathbb{E}_r [\mathbb{E}_{r,h-1} [\|g_{r,h} - \bar{g}_{r,h}\|^2] + \|\bar{g}_{r,h}\|^2] \\ &= \frac{\sigma^2}{M} + \mathbb{E}_r [\|\bar{g}_{r,h}\|^2], \end{aligned}$$

1059 where we use  $\mathbb{E}_{r,h-1} [\cdot]$  to denote expectation conditional on the  $\sigma$ -algebra generated by all the  
 1060 stochastic gradients up to and including step  $h - 1$ . Substituting this into Equation (11),

$$\begin{aligned} \mathbb{E}_r [\|x_{r+1} - x_*\|^2] &\leq \|x_r - x_*\|^2 + 2\eta\gamma \sum_{h=0}^{H-1} \mathbb{E}_r [\langle x_* - y_{r,h}, g_{r,h} \rangle] + \frac{\gamma\eta^2 H \sigma^2}{M} \\ &\quad + \gamma\eta^2 \sum_{h=0}^{H-1} \mathbb{E}_r [\|\bar{g}_{r,h}\|^2] + \eta^2\gamma(\gamma - 1) \mathbb{E}_r \left[ \left\| \sum_{h=0}^{H-1} g_{r,h} \right\|^2 \right]. \end{aligned} \quad (12)$$

1061 Now we bound the inner product term:

$$\begin{aligned}
\mathbb{E}_r [\langle x_* - y_{r,h}, g_{r,h} \rangle] &= \mathbb{E}_r [\mathbb{E}_{h-1} [\langle x_* - y_{r,h}, g_{r,h} \rangle]] \\
&= \mathbb{E}_r [\langle x_* - y_{r,h}, \bar{g}_{r,h} \rangle] \\
&= \frac{1}{M} \sum_{m=1}^M \mathbb{E}_r [\langle x_* - y_{r,h}, \bar{g}_{m,r,h} \rangle] \\
&= \frac{1}{M} \sum_{m=1}^M \mathbb{E}_r [\langle x_* - y_{m,r,h} + y_{m,r,h} - y_{r,h}, \bar{g}_{m,r,h} \rangle] \\
&= \frac{1}{M} \sum_{m=1}^M \mathbb{E}_r [\langle x_* - y_{m,r,h}, \bar{g}_{m,r,h} \rangle] + \frac{1}{M} \sum_{m=1}^M \mathbb{E}_r [\langle y_{m,r,h} - y_{r,h}, \bar{g}_{m,r,h} \rangle].
\end{aligned}$$

1062 Using Young's inequality for the second term,

$$\mathbb{E}_r [\langle x_* - y_{r,h}, g_{r,h} \rangle] \tag{13}$$

$$\begin{aligned}
&\leq \frac{1}{M} \sum_{m=1}^M \mathbb{E}_r [\langle x_* - y_{m,r,h}, \bar{g}_{m,r,h} \rangle] + \frac{1}{M} \sum_{m=1}^M \mathbb{E}_r \left[ \frac{\|y_{m,r,h} - y_{r,h}\|^2}{2\alpha} + \frac{\alpha}{2} \|\bar{g}_{m,r,h}\|^2 \right] \\
&= \frac{1}{M} \sum_{m=1}^M \mathbb{E}_r [\langle x_* - y_{m,r,h}, \bar{g}_{m,r,h} \rangle] + \frac{V_{r,h}}{2\alpha} + \frac{\alpha}{2M} \sum_{m=1}^M \mathbb{E}_r [\|\bar{g}_{m,r,h}\|^2],
\end{aligned} \tag{14}$$

1063 where  $V_{r,h} = \frac{1}{M} \sum_{m=1}^M \mathbb{E}_r [\|y_{m,r,h} - y_{r,h}\|^2]$  by definition. By the convexity of  $f$ ,

$$\begin{aligned}
\langle x_* - y_{m,r,h}, \bar{g}_{m,r,h} \rangle &= \langle x_* - y_{m,r,h}, \nabla f(y_{m,r,h}) \rangle \\
&\leq f(x_*) - f(y_{m,r,h}) \\
&= -(f(y_{m,r,h}) - f(x_*)).
\end{aligned} \tag{15}$$

1064 For the variance term, when  $\eta \leq \frac{1}{L}$  we use Lemma B.7

$$\begin{aligned}
V_{r,h} &= \frac{1}{M} \sum_{m=1}^M \mathbb{E}_r [\|y_{m,r,h} - y_{r,h}\|^2] \\
&\leq \frac{1}{M} \sum_{m=1}^M \frac{1}{M} \sum_{s=1}^M \mathbb{E}_r [\|y_{m,r,h} - y_{s,r,h}\|^2] \\
&= \frac{1}{M^2} \sum_{m=1}^M \sum_{s=1}^M \mathbb{E}_r [\|y_{m,r,h} - y_{s,r,h}\|^2] \\
&\leq 2\eta^2 \sigma^2 h \leq 2\eta^2 \sigma^2 H.
\end{aligned} \tag{16}$$

1065 By smoothness,

$$\|\bar{g}_{m,r,h}\|^2 = \|\nabla f(y_{m,r,h})\|^2 \leq 2L(f(y_{m,r,h}) - f(x_*)). \tag{17}$$

1066 Plugging Equations (15) to (17) back into Equation (14) we get

$$\mathbb{E}_r [\langle x_* - y_{r,h}, g_{r,h} \rangle] \leq \frac{-(1-\alpha L)}{M} \sum_{m=1}^M (\mathbb{E}_r [f(y_{m,r,h})] - f(x_*)) + \frac{\eta^2 \sigma^2 H}{\alpha}. \tag{18}$$

1067 Substituting (18) back into our main recursion (Equation (11)),

$$\begin{aligned}
\mathbb{E}_r [\|x_{r+1} - x_*\|^2] &\leq \|x_r - x_*\|^2 - \frac{2\eta\gamma(1-\alpha L)}{M} \sum_{h=0}^{H-1} \sum_{m=1}^M (\mathbb{E}_r [f(y_{m,r,h})] - f(x_*)) + \frac{2\eta^3 \gamma \sigma^2 H^2}{\alpha} \\
&\quad + \frac{\gamma \eta^2 H \sigma^2}{M} + \gamma \eta^2 \sum_{h=0}^{H-1} \mathbb{E}_r [\|\bar{g}_{r,h}\|^2] + \eta^2 \gamma (\gamma - 1) \mathbb{E}_r \left[ \left\| \sum_{h=0}^{H-1} g_{r,h} \right\|^2 \right].
\end{aligned} \tag{19}$$

1068 We now have two cases. **Case 1.** If  $\gamma \geq 1$ , then we have by Lemma B.3 and Jensen's inequality  
 1069 applied to  $\|\cdot\|^2$ ,

$$\begin{aligned}
 \mathbb{E}_r \left[ \left\| \sum_{h=0}^{H-1} g_{r,h} \right\|^2 \right] &= \mathbb{E}_r \left[ \left\| \sum_{h=0}^{H-1} (g_{r,h} - \mathbb{E}_r [g_{r,h}]) \right\|^2 \right] + \left\| \sum_{h=0}^{H-1} (\mathbb{E}_r [g_{r,h}]) \right\|^2 \\
 &= \mathbb{E}_r \left[ \left\| \sum_{h=0}^{H-1} (g_{r,h} - \mathbb{E}_r [g_{r,h}]) \right\|^2 \right] + \left\| \sum_{h=0}^{H-1} (\mathbb{E}_r [\mathbb{E}_{r,h-1} [g_{r,h}]] ) \right\|^2 \\
 &= \mathbb{E}_r \left[ \left\| \sum_{h=0}^{H-1} (g_{r,h} - \mathbb{E}_r [g_{r,h}]) \right\|^2 \right] + \left\| \sum_{h=0}^{H-1} \mathbb{E}_r [\bar{g}_{r,h}] \right\|^2 \\
 &\leq \frac{\sigma^2 H}{M} + \mathbb{E}_r \left[ \left\| \sum_{h=0}^{H-1} \bar{g}_{r,h} \right\|^2 \right] \\
 &\leq \frac{\sigma^2 H}{M} + H \sum_{h=0}^{H-1} \mathbb{E}_r [\|\bar{g}_{r,h}\|^2]. \tag{20}
 \end{aligned}$$

1070 Using Jensen's inequality and smoothness we have

$$\begin{aligned}
 \mathbb{E}_r [\|\bar{g}_{r,h}\|^2] &= \mathbb{E}_r \left[ \left\| \frac{1}{M} \sum_{m=1}^M \nabla f(y_{m,r,h}) \right\|^2 \right] \\
 &\leq \frac{1}{M} \sum_{m=1}^M \mathbb{E}_r [\|\nabla f(y_{m,r,h})\|^2] \\
 &\leq \frac{2L}{M} \sum_{m=1}^M \mathbb{E}_r [f(y_{m,r,h}) - f(x_*)]. \tag{21}
 \end{aligned}$$

1071 Using Equations (20) and (21) into Equation (19) we get

$$\begin{aligned}
 \mathbb{E}_r [\|x_{r+1} - x_*\|^2] &\leq \|x_r - x_*\|^2 \\
 &\quad - \frac{2\eta\gamma(1 - \alpha L) - 2L\gamma\eta^2(1 + (\gamma - 1)H)}{M} \sum_{h=0}^{H-1} \sum_{m=1}^M (\mathbb{E}_r [f(y_{m,r,h})] - f(x_*)) + \frac{2\eta^3\gamma\sigma^2 H^2}{\alpha} \\
 &\quad + \frac{\gamma^2\eta^2 H\sigma^2}{M}. \\
 &= \|x_r - x_*\|^2 - \frac{2\eta\gamma[1 - \alpha L - L\eta(1 + (\gamma - 1)H)]}{M} \sum_{h=0}^{H-1} \sum_{m=1}^M (\mathbb{E}_r [f(y_{m,r,h})] - f(x_*)) \\
 &\quad + \frac{2\eta^3\gamma\sigma^2 H^2}{\alpha} + \frac{\gamma^2\eta^2 H\sigma^2}{M}. \\
 &= \|x_r - x_*\|^2 - 2\eta\gamma H(1 - \alpha L - L\eta(1 + (\gamma - 1)H)) \mathbb{E}_r [\hat{\delta}_{r+1}] + \frac{2\eta^3\gamma\sigma^2 H^2}{\alpha} + \frac{\eta^2\gamma^2 H\sigma^2}{M}, \tag{22}
 \end{aligned}$$

1072 where in the last line we defined

$$\hat{\delta}_{r+1} = \frac{1}{MH} \sum_{h=0}^{H-1} \sum_{m=1}^M (f(y_{m,r,h}) - f(x_*)) \tag{23}$$



1073 **Case 2.** If  $\gamma \leq 1$ , then we can simply drop the last term in Equation (19) and use Equation (17) to get

$$\begin{aligned} \mathbb{E}_r \left[ \|x_{r+1} - x_*\|^2 \right] &\leq \|x_r - x_*\|^2 - \frac{2\eta\gamma(1 - \alpha L - \eta L)}{M} \sum_{h=0}^{H-1} \sum_{m=1}^M (\mathbb{E}_r [f(y_{m,r,h})] - f(x_*)) \\ &\quad + \frac{2\eta^3\gamma\sigma^2 H^2}{\alpha} + \frac{\gamma\eta^2 H\sigma^2}{M} \\ &= \|x_r - x_*\|^2 - 2\eta\gamma H(1 - \alpha L - \eta L)\mathbb{E}_r [\hat{\delta}_{r+1}] + \frac{2\eta^3\gamma\sigma^2 H^2}{\alpha} + \frac{\gamma\eta^2 H\sigma^2}{M}, \end{aligned} \quad (24)$$

1074 where in Equation (24) we again used the definition in Equation (23). Looking at both Equations (22)  
1075 and (24) and taking the maximum we get that for *any*  $\gamma$ ,

$$\begin{aligned} \mathbb{E}_r \left[ \|x_{r+1} - x_*\|^2 \right] &\leq \|x_r - x_*\|^2 - 2\eta\gamma H(1 - \alpha L - \eta L(1 + (\gamma - 1)_+ H))\mathbb{E}_r [\hat{\delta}_{r+1}] \\ &\quad + \frac{2\eta^3\gamma\sigma^2 H^2}{\alpha} + \frac{\eta^2 \max\{\gamma^2, \gamma\} H\sigma^2}{M}, \end{aligned}$$

1076 where  $(x)_+ = \max(x, 0)$  is the ReLU function. Putting  $\alpha = \frac{1}{2L}$  we get

$$\begin{aligned} \mathbb{E}_r \left[ \|x_{r+1} - x_*\|^2 \right] &\leq \|x_r - x_*\|^2 - \eta\gamma H(1 - 2\eta L(1 + (\gamma - 1)_+ H))\mathbb{E}_r [\hat{\delta}_{r+1}] \\ &\quad + 4L\eta^3\gamma\sigma^2 H^2 + \frac{\eta^2 \max\{\gamma^2, \gamma\} H\sigma^2}{M}. \end{aligned}$$

1077 Under the requirement that the stepsizes  $\eta, \gamma$  satisfy

$$\eta L(1 + (\gamma - 1)_+ H) \leq \frac{1}{4},$$

1078 we obtain our recursion

$$\mathbb{E}_r \left[ \|x_{r+1} - x_*\|^2 \right] \leq \|x_r - x_*\|^2 - \frac{\eta\gamma H}{2} \mathbb{E}_r [\hat{\delta}_{r+1}] + 4L\eta^3\gamma\sigma^2 H^2 + \frac{\eta^2 \max\{\gamma^2, \gamma\} H\sigma^2}{M}.$$

1079 Taking unconditional expectations and rearranging we obtain,

$$\mathbb{E} [\hat{\delta}_{r+1}] \leq \frac{2}{\gamma\eta H} \left[ \mathbb{E} [\|x_r - x_*\|^2] - \mathbb{E} [\|x_{r+1} - x_*\|^2] \right] + 8L\eta^2\sigma^2 H + \frac{2\eta \max(\gamma, 1)\sigma^2}{M}.$$

1080 Summing up both sides as  $r$  varies from 0 to  $R - 1$  and dividing by  $1/R$  we get

$$\frac{1}{R} \sum_{r=0}^{R-1} \mathbb{E} [\hat{\delta}_{r+1}] \leq \frac{2}{\gamma\eta RH} \left[ \|x_0 - x_*\|^2 - \mathbb{E} [\|x_R - x_*\|^2] \right] + 8L\eta^2\sigma^2 H + \frac{2\eta \max(\gamma, 1)\sigma^2}{M}.$$

1081 Observe that we can write  $\max(\gamma, 1) = 1 + (\gamma - 1)_+$ . Dropping the negative term and using Jensen's  
1082 inequality gives

$$\begin{aligned} \mathbb{E} \left[ f \left( \frac{1}{MRH} \sum_{r=0}^{R-1} \sum_{h=0}^{H-1} \sum_{m=1}^M f(y_{m,r,h}) \right) \right] - f(x_*) &\leq \frac{1}{R} \sum_{r=0}^{R-1} \mathbb{E} [\hat{\delta}_{r+1}] \\ &\leq \frac{2\|x_0 - x_*\|^2}{\gamma\eta RH} + 8L\eta^2\sigma^2 H + \frac{2\eta \max(\gamma, 1)\sigma^2}{M}, \end{aligned}$$

1083 and this is the statement of our theorem.  $\square$

### 1084 B.3 Non-adaptive guarantee with momentum

1085 We present two guarantees. One is the proof of Theorem 3.5 as it is, and a second is **a new proof**  
1086 **without the bounded iterates assumption**. The latter is new and wasn't mentioned in the main text,  
1087 but is strictly superior to the claim in the main text. We start by presenting the new proof first.

### 1088 B.3.1 Main momentum guarantee

1089 **Theorem B.8.** *Let  $f$  be an  $L$ -smooth convex function. Consider Local SGD with momentum*  
 1090 *parameter  $\mu \in [0, 1)$  and communication interval  $H$ . Assume the stochastic gradients satisfy the*  
 1091  *$\sigma^2$ -bounded variance assumption. Let the step sizes  $\eta, \gamma$  satisfy*

$$\eta L \left( 1 + \left( \frac{\gamma}{1-\mu} - 1 \right)_+ H \right) \leq \frac{1}{4}, \quad \frac{\eta \gamma \mu L H}{1-\mu} \leq \frac{1}{16}.$$

1092 *Then after  $R$  rounds of communication, the averaged iterate satisfies*

$$\begin{aligned} \mathbb{E}[f(y_{\text{out}})] - f(x_*) &\leq \frac{4(1-\mu)\|z_0 - x_*\|^2}{\eta \gamma H R} + 16L\eta^2 \sigma^2 H \\ &\quad + \frac{4\eta \sigma^2}{M} \max\left(\frac{\gamma}{1-\mu}, 1\right) + \frac{8\eta \gamma \mu \sigma^2}{1-\mu} \frac{1}{M}. \end{aligned}$$

1093 *Proof.* We analyze the momentum variant of Local SGD:

$$x_{r+1} = x_r - \eta \gamma \left( \sum_{h=0}^{H-1} g_{r,h} \right) + \mu(x_r - x_{r-1}).$$

1094 Define

$$z_r = x_r + \frac{\mu}{1-\mu}(x_r - x_{r-1}).$$

1095 Then

$$z_{r+1} = z_r - \frac{\eta \gamma}{1-\mu} \sum_{h=0}^{H-1} g_{r,h}.$$

1096 We have

$$\begin{aligned} \|z_{r+1} - x_*\|^2 &= \|z_r - x_*\|^2 + \frac{\eta^2 \gamma^2}{(1-\mu)^2} \left\| \sum_{h=0}^{H-1} g_{r,h} \right\|^2 - \frac{2\eta \gamma}{1-\mu} \sum_{h=0}^{H-1} \langle z_r - x_*, g_{r,h} \rangle \\ &= \|z_r - x_*\|^2 + \frac{\eta^2 \gamma^2}{(1-\mu)^2} \left\| \sum_{h=0}^{H-1} g_{r,h} \right\|^2 - \frac{2\eta \gamma}{1-\mu} \sum_{h=0}^{H-1} \langle x_r - x_*, g_{r,h} \rangle \\ &\quad - \frac{2\eta \gamma \mu}{1-\mu} \sum_{h=0}^{H-1} \langle x_r - x_{r-1}, g_{r,h} \rangle. \end{aligned} \tag{25}$$

1097 Following the same proof as Theorem 3.3, we can bound (in expectation)

$$\begin{aligned} -\frac{2\eta \gamma}{1-\mu} \sum_{h=0}^{H-1} \mathbb{E}_r[\langle x_r - x_*, g_{r,h} \rangle] &+ \frac{\eta^2 \gamma^2}{(1-\mu)^2} \mathbb{E}_r \left[ \left\| \sum_{h=0}^{H-1} g_{r,h} \right\|^2 \right] \leq -\frac{\eta \gamma H}{2(1-\mu)} \mathbb{E}_r[\hat{\delta}_{r+1}] \\ &+ 4L\eta^3 \frac{\gamma}{1-\mu} \sigma^2 H^2 + \frac{\eta^2 H \sigma^2}{M} \max \left( \left( \frac{\gamma}{1-\mu} \right)^2, \frac{\gamma}{1-\mu} \right), \end{aligned} \tag{26}$$

1098 because the local optimization procedure is the same– the same analysis holds line-by-line, only  
 1099 replacing  $\gamma$  by  $\frac{\gamma}{1-\mu}$ , and requiring instead that

$$\eta L \left( 1 + \left( \frac{\gamma}{1-\mu} - 1 \right)_+ H \right) \leq \frac{1}{4}. \tag{27}$$

1100 Using Equation (26) in Equation (25) (after taking expectation in the latter) we obtain

$$\begin{aligned} \mathbb{E}_r \left[ \|z_{r+1} - x_*\|^2 \right] &\leq \|z_r - x_*\|^2 - \frac{\eta\gamma H}{2(1-\mu)} \mathbb{E}_r \left[ \hat{\delta}_{r+1} \right] + 4L\eta^3 \frac{\gamma\sigma^2 H^2}{1-\mu} \\ &\quad + \frac{\eta^2 H\sigma^2}{M} \max \left( \left( \frac{\gamma}{1-\mu} \right)^2, \frac{\gamma}{1-\mu} \right) - \frac{2\eta\gamma\mu}{1-\mu} \sum_{h=0}^{H-1} \langle x_r - x_{r-1}, \bar{g}_{r,h} \rangle. \end{aligned} \quad (28)$$

1101 In the following, we use the shorthand  $G_r \stackrel{\text{def}}{=} \sum_{h=0}^{H-1} g_{r,h}$ . We now proceed to bound  
 1102  $\sum_{h=0}^{H-1} \langle x_{r-1} - x_r, g_{r,h} \rangle = \langle x_{r-1} - x_r, G_r \rangle$  without using the bounded iterates assumption. We  
 1103 note that by definition:

$$x_r - x_{r-1} = -\eta\gamma G_{r-1} + \mu(x_{r-1} - x_{r-2}).$$

1104 Expanding this out recursively, we get the following formula:

$$x_r - x_{r-1} = -\eta\gamma \sum_{s=0}^{r-1} \mu^{r-1-s} G_s.$$

1105 For our analysis, we'll bound the inner product

$$\begin{aligned} \langle x_{r-1} - x_r, G_r \rangle &= \left\langle \eta\gamma \sum_{s=0}^{r-1} \mu^{r-1-s} G_s, G_r \right\rangle \\ &= \eta\gamma \sum_{s=0}^{r-1} \mu^{r-1-s} \langle G_s, G_r \rangle \end{aligned}$$

1106 We will actually bound the sum of the momentum terms over  $r$ , i.e.  $\sum_r \langle x_{r-1} - x_r, G_r \rangle$ . We have

$$\begin{aligned} \sum_r \langle x_{r-1} - x_r, G_r \rangle &= \frac{\eta\gamma}{\mu} \sum_r \sum_{s < r} \langle \mu^{r-s} G_s, G_r \rangle \\ &= \frac{\eta\gamma}{2\mu} \left[ \sum_r \sum_s \langle \mu^{|r-s|} G_s, G_r \rangle - \sum_r \|G_r\|^2 \right]. \end{aligned}$$

1107 To bound the first term above, let  $A$  be the  $R \times R$  matrix whose  $(r, s)$ th entry equals  $\mu^{|r-s|}$ , and let  
 1108  $\Gamma = [G_1 | G_2 | \dots | G_R]$ . Then

$$\sum_r \sum_s \langle \mu^{|r-s|} G_s, G_r \rangle = \text{Tr}(\Gamma A \Gamma^\top).$$

1109 We now apply the Gershgorin circle theorem to bound this sum, observe that largest sum of absolute  
 1110 values of entries in a row satisfy

$$1 + 2 \sum_{r=1}^{(R-1)/2} \mu^r = 1 + 2\mu \frac{1 - \mu^{(R-1)/2}}{1 - \mu} = \frac{1 + \mu - 2\mu^{(R+1)/2}}{1 - \mu} \leq \frac{1 + \mu}{1 - \mu}.$$

1111 Then, we have

$$\text{Tr}(\Gamma A \Gamma^\top) \leq \frac{1 + \mu}{1 - \mu} \text{Tr}(\Gamma \Gamma^\top) = \frac{1 + \mu}{1 - \mu} \sum_r \|G_r\|^2.$$

1112 Therefore, taking expectations we have

$$\begin{aligned} -\frac{2\eta\gamma\mu}{1-\mu} \sum_{r=0}^{R-1} \sum_{h=0}^{H-1} \mathbb{E} [\langle x_r - x_{r-1}, g_{r,h} \rangle] &= \frac{2\eta\gamma\mu}{1-\mu} \sum_{r=0}^{R-1} \mathbb{E} [\langle x_{r-1} - x_r, G_r \rangle] \\ &\leq \frac{2\eta\gamma\mu}{1-\mu} \frac{\eta\gamma}{1-\mu} \sum_{r=0}^{R-1} \mathbb{E} \left[ \left\| \sum_{h=0}^{H-1} g_{r,h} \right\|^2 \right]. \end{aligned} \quad (29)$$

1113 Using Lemma B.3 we have

$$\begin{aligned}\mathbb{E} \left[ \left\| \sum_{h=0}^{H-1} g_{r,h} \right\|^2 \right] &\leq \frac{\sigma^2 H}{M} + \mathbb{E} \left[ \left\| \sum_{h=0}^{H-1} \bar{g}_{r,h} \right\|^2 \right] \\ &\leq \frac{\sigma^2 H}{M} + H \sum_{h=0}^{H-1} \mathbb{E} [\|\bar{g}_{r,h}\|^2] \\ &\leq \frac{\sigma^2 H}{M} + 2LH^2 \mathbb{E} [\hat{\delta}_{r+1}],\end{aligned}$$

1114 where in the last line we used Jensen's inequality and smoothness. Using this result in Equation (29)  
1115 we get

$$-\frac{2\eta\gamma\mu}{1-\mu} \sum_{r=0}^{R-1} \sum_{h=0}^{H-1} \mathbb{E} [\langle x_r - x_{r-1}, g_{r,h} \rangle] \leq \frac{\eta\gamma}{2(1-\mu)} \frac{4\eta\gamma\mu}{1-\mu} \left[ \frac{\sigma^2 RH}{M} + 2LH^2 \sum_{r=0}^{R-1} \mathbb{E} [\hat{\delta}_{r+1}] \right]. \quad (30)$$

1116 Rearranging and summing up Equation (28) then using Equation (30) we have

$$\begin{aligned}\mathbb{E} [\|z_R - x_*\|^2] &\leq \|z_0 - x_*\|^2 - \frac{\eta\gamma H}{2(1-\mu)} \left[ 1 - \frac{8\eta\gamma\mu LH}{1-\mu} \right] \sum_{r=0}^{R-1} \mathbb{E} [\hat{\delta}_{r+1}] \\ &\quad + 4L\eta^3 \frac{\gamma\sigma^2 H^2}{1-\mu} R + \frac{\eta^2 H\sigma^2}{M} \max \left( \left( \frac{\gamma}{1-\mu} \right)^2, \frac{\gamma}{1-\mu} \right) R + \frac{\eta\gamma H}{1-\mu} \frac{2\eta\gamma\mu}{1-\mu} \frac{\sigma^2 R}{M}.\end{aligned}$$

1117 Observe that under the condition

$$\frac{\eta\gamma\mu LH}{1-\mu} \leq \frac{1}{16}$$

1118 the last inequality becomes

$$\begin{aligned}\mathbb{E} [\|z_R - x_*\|^2] &\leq \|z_0 - x_*\|^2 - \frac{\eta\gamma H}{4(1-\mu)} \sum_{r=0}^{R-1} \mathbb{E} [\hat{\delta}_{r+1}] \\ &\quad + 4L\eta^3 \frac{\gamma\sigma^2 H^2}{1-\mu} R + \frac{\eta^2 H\sigma^2}{M} \max \left( \left( \frac{\gamma}{1-\mu} \right)^2, \frac{\gamma}{1-\mu} \right) R + \frac{\eta\gamma H}{1-\mu} \frac{2\eta\gamma\mu}{1-\mu} \frac{\sigma^2 R}{M}.\end{aligned}$$

1119 Continuing the proof and rearranging we get

$$\frac{1}{R} \sum_{r=0}^{R-1} \mathbb{E} [\hat{\delta}_{r+1}] \leq \frac{4(1-\mu)\|z_0 - x_*\|^2}{\eta\gamma HR} + 16L\eta^2\sigma^2 H + \frac{4\eta\sigma^2}{M} \max \left( \frac{\gamma}{1-\mu}, 1 \right) + \frac{8\eta\gamma\mu}{1-\mu} \frac{\sigma^2}{M}.$$

1120 It remains to use Jensen's inequality.  $\square$

### 1121 B.3.2 Legacy guarantee

1122 *Proof of Theorem 3.5.* We analyze the momentum variant of Local SGD,

$$x_{r+1} = x_r - \eta\gamma \left( \sum_{h=0}^{H-1} g_{r,h} \right) + \mu(x_r - x_{r-1}).$$

1123 Define

$$z_r = x_r + \frac{\mu}{1-\mu} (x_r - x_{r-1}).$$

1124 Then

$$z_{r+1} = z_r - \frac{\eta\gamma}{1-\mu} \sum_{h=0}^{H-1} g_{r,h}.$$

1125 We have

$$\begin{aligned} \|z_{r+1} - x_*\|^2 &= \|z_r - x_*\|^2 + \frac{\eta^2 \gamma^2}{(1-\mu)^2} \left\| \sum_{h=0}^{H-1} g_{r,h} \right\|^2 - \frac{2\eta\gamma}{1-\mu} \sum_{h=0}^{H-1} \langle x_r - x_*, g_{r,h} \rangle \\ &\quad - \frac{2\eta\gamma\mu}{1-\mu} \sum_{h=0}^{H-1} \langle x_r - x_{r-1}, g_{r,h} \rangle. \end{aligned} \quad (31)$$

1126 Following the same proof as Theorem 3.3 we can bound (in expectation)

$$\begin{aligned} -\frac{2\eta\gamma}{1-\mu} \sum_{h=0}^{H-1} \mathbb{E}_r [\langle x_r - x_*, g_{r,h} \rangle] &+ \frac{\eta^2 \gamma^2}{(1-\mu)^2} \mathbb{E}_r \left[ \left\| \sum_{h=0}^{H-1} g_{r,h} \right\|^2 \right] \leq -\frac{\eta\gamma H}{2(1-\mu)} \mathbb{E}_r [\hat{\delta}_{r+1}] \\ &+ 4L\eta^3 \frac{\gamma}{1-\mu} \sigma^2 H^2 + \frac{\eta^2 H \sigma^2}{M} \max \left( \left( \frac{\gamma}{1-\mu} \right)^2, \frac{\gamma}{1-\mu} \right), \end{aligned} \quad (32)$$

1127 because the local optimization procedure is the same– the same analysis holds line-by-line, only  
1128 replacing  $\gamma$  by  $\frac{\gamma}{1-\mu}$ , and requiring instead that

$$\eta L \left( 1 + \left( \frac{\gamma}{1-\mu} - 1 \right)_+ H \right) \leq \frac{1}{4}. \quad (33)$$

1129 To bound the last inner product in Equation (31), observe that if the domain is  $D$ -bounded,

$$\begin{aligned} \langle x_{r-1} - x_r, \bar{g}_{r,h} \rangle &\leq \frac{D^2}{2\rho} + \frac{\rho}{2} \|\bar{g}_{r,h}\|^2 \\ &\leq \frac{D^2}{2\rho} + \frac{L\rho}{M} \sum_{m=1}^M (f(y_{m,r,h}) - f_*). \end{aligned}$$

1130 Summing up over  $H$  we get

$$\sum_{h=0}^{H-1} \mathbb{E}_r [\langle x_{r-1} - x_r, \bar{g}_{r,h} \rangle] \leq \frac{D^2 H}{2\rho} + L\rho H \mathbb{E}_r [\hat{\delta}_{r+1}]. \quad (34)$$

1131 Plugging Equations (32) and (34) into Equation (31) we get

$$\begin{aligned} \mathbb{E}_r [\|z_{r+1} - x_*\|^2] &\leq \|z_r - x_*\|^2 - \left[ \frac{\eta\gamma H}{2(1-\mu)} - \frac{2\eta\gamma\mu L\rho H}{(1-\mu)} \right] \mathbb{E}_r [\hat{\delta}_{r+1}] + \frac{4L\eta^3 \gamma \sigma^2 H^2}{1-\mu} \\ &\quad + \frac{\eta^2 H \sigma^2}{M} \max \left( \left( \frac{\gamma}{1-\mu} \right)^2, \frac{\gamma}{1-\mu} \right) + \frac{\eta\gamma\mu H D^2}{(1-\mu)\rho}. \end{aligned}$$

1132 Setting  $\rho = \frac{1}{8\mu L}$ , we get

$$\begin{aligned} \|z_{r+1} - x_*\|^2 &\leq \|z_r - x_*\|^2 - \frac{\eta\gamma H}{4(1-\mu)} \hat{\delta}_{r+1} + \frac{4L\eta^3 \gamma \sigma^2 H^2}{(1-\mu)} \\ &\quad + \frac{\eta^2 H \sigma^2}{M} \max \left( \left( \frac{\gamma}{1-\mu} \right)^2, \frac{\gamma}{1-\mu} \right) + \frac{4\eta\gamma\mu^2 L H D^2}{1-\mu}. \end{aligned}$$

1133 We then continue exactly as in the proof of Theorem 3.3 to obtain

$$\begin{aligned} \mathbb{E} \left[ f \left( \frac{1}{MRH} \sum_{r=0}^{R-1} \sum_{h=0}^{H-1} \sum_{m=1}^M y_{m,r,h} \right) \right] - f(x_*) &\leq \frac{4(1-\mu)}{\eta\gamma RH} \|x_0 - x_*\|^2 + \frac{16L\eta^2 \gamma \sigma^2 H}{1-\mu} \\ &\quad + \frac{4\eta\sigma^2}{M} \max \left( \frac{\gamma}{1-\mu}, 1 \right) + 16\mu^2 L D^2. \end{aligned}$$

1134

□

## 1135 B.4 Data-dependent guarantees

1136 **Lemma B.9.** *Let  $f$  be a convex and  $L$ -smooth function. Suppose that we run SGD on  $f$  on  $M$*   
 1137 *parallel nodes as follows*

$$y_{m,r,0} = x_r,$$

$$y_{m,r,h+1} = y_{m,r,h} - \eta g_{m,r,h},$$

1138 *where  $m = 1, 2, \dots, M$ ,  $h = 0, 1, \dots, H-1$ , and  $g_{1,r,h}, g_{2,r,h}, \dots, g_{M,r,h}$  are i.i.d. stochastic gra-*  
 1139 *dient estimates such that  $\mathbb{E}_{r,h}[g_{m,r,h}] = \nabla f(y_{m,r,h})$ , where  $\mathbb{E}_{r,h}[\cdot]$  denotes expectation conditional*  
 1140 *on all information up to and including round  $r$  and local step  $h$ , and  $\|g_{m,r,h} - \nabla f(y_{m,r,h})\| \leq \sigma$ .*  
 1141 *Define further  $y_{r,h} = \frac{1}{M} \sum_{m=1}^M y_{m,r,h}$ . Let  $V_{r,h} = \frac{1}{M} \sum_{m=1}^M \|y_{m,r,h} - y_{r,h}\|^2$ . Then for all  $\eta \leq \frac{1}{L}$*   
 1142 *we have with probability at least  $1 - \delta$  that for all  $h = 0, 1, \dots, H$*

$$V_{r,h} \leq 4104\eta^2\sigma^2(h+1)\theta_{h-1,\delta}^2,$$

1143 *where  $\theta_{h,\delta} = \log \frac{60 \log 6h}{\delta}$ .*

1144 *Proof.* Define

$$\Lambda_{r,h+1} = \frac{1}{M^2} \sum_{m=1}^M \sum_{s=1}^M \|y_{m,r,h+1} - y_{s,r,h+1}\|^2. \quad (35)$$

1145 We will bound  $\Lambda_{r,h}$  first, and then use it to bound  $V_{r,h}$  later. We have

$$\begin{aligned} y_{m,r,h+1} - y_{s,r,h+1} &= y_{m,r,h} - \eta g_{m,r,h} - [y_{s,r,h} - \eta g_{s,r,h}] \\ &= y_{m,r,h} - \eta \nabla f(y_{m,r,h}) - \eta [g_{m,r,h} - \nabla f(y_{m,r,h})] - [y_{s,r,h} - \eta \nabla f(y_{s,r,h}) - \eta [g_{s,r,h} - \nabla f(y_{s,r,h})]] \\ &= [y_{m,r,h} - \eta \nabla f(y_{m,r,h}) - [y_{s,r,h} - \eta \nabla f(y_{s,r,h})]] - \eta [(g_{m,r,h} - g_{s,r,h}) - [\nabla f(y_{m,r,h}) - \nabla f(y_{s,r,h})]]. \end{aligned}$$

1146 Therefore

$$\begin{aligned} \|y_{m,r,h+1} - y_{s,r,h+1}\|^2 &= \|T_\eta(y_{m,r,h}) - T_\eta(y_{s,r,h})\|^2 \\ &\quad + \eta^2 \|(g_{m,r,h} - g_{s,r,h}) - (\nabla f(y_{m,r,h}) - \nabla f(y_{s,r,h}))\|^2 \\ &\quad - 2\eta \langle T_\eta(y_{m,r,h}) - T_\eta(y_{s,r,h}), (g_{m,r,h} - g_{s,r,h}) - (\nabla f(y_{m,r,h}) - \nabla f(y_{s,r,h})) \rangle \end{aligned} \quad (36)$$

1147 We define  $\rho_{m,r,h}$  as the stochastic gradient noise on node  $m$  at round  $r$ , step  $h$ :  $\rho_{m,r,h} = g_{m,r,h} -$   
 1148  $\nabla f(y_{m,r,h})$ . Then we can write Equation (36) as

$$\begin{aligned} \|y_{m,r,h+1} - y_{s,r,h+1}\|^2 &= \|T_\eta(y_{m,r,h}) - T_\eta(y_{s,r,h})\|^2 + \eta^2 \|\rho_{m,r,h} - \rho_{s,r,h}\|^2 \\ &\quad - 2\eta \langle T_\eta(y_{m,r,h}) - T_\eta(y_{s,r,h}), \rho_{m,r,h} - \rho_{s,r,h} \rangle. \end{aligned} \quad (37)$$

1149 We now use the inequality  $\|a+b\|^2 \leq 2\|a\|^2 + 2\|b\|^2$  to get

$$\begin{aligned} \|y_{m,r,h+1} - y_{s,r,h+1}\|^2 &\leq \|T_\eta(y_{m,r,h}) - T_\eta(y_{s,r,h})\|^2 + 2\eta^2 \|\rho_{m,r,h}\|^2 + 2\eta^2 \|\rho_{s,r,h}\|^2 \\ &\quad - 2\eta \langle T_\eta(y_{m,r,h}) - T_\eta(y_{s,r,h}), \rho_{m,r,h} - \rho_{s,r,h} \rangle. \end{aligned}$$

1150 By Lemma B.1, we have

$$\begin{aligned} \|y_{m,r,h+1} - y_{s,r,h+1}\|^2 &\leq \|y_{m,r,h} - y_{s,r,h}\|^2 + 2\eta^2 \|\rho_{m,r,h}\|^2 + 2\eta^2 \|\rho_{s,r,h}\|^2 \\ &\quad - 2\eta \langle T_\eta(y_{m,r,h}) - T_\eta(y_{s,r,h}), \rho_{m,r,h} - \rho_{s,r,h} \rangle. \end{aligned}$$

1151 Now, we consider the inner product term, observe

$$\begin{aligned} &\langle T_\eta(y_{m,r,h}) - T_\eta(y_{s,r,h}), \rho_{m,r,h} - \rho_{s,r,h} \rangle \\ &= \langle T_\eta(y_{m,r,h}) - T_\eta(y_{r,h}) + T_\eta(y_{r,h}) - T_\eta(y_{s,r,h}), \rho_{m,r,h} - \rho_{s,r,h} \rangle \\ &= \langle T_\eta(y_{m,r,h}) - T_\eta(y_{r,h}), \rho_{m,r,h} - \rho_{s,r,h} \rangle + \langle T_\eta(y_{r,h}) - T_\eta(y_{s,r,h}), \rho_{m,r,h} - \rho_{s,r,h} \rangle \\ &= \langle T_\eta(y_{m,r,h}) - T_\eta(y_{r,h}), \rho_{m,r,h} - \rho_{s,r,h} \rangle + \langle -(T_\eta(y_{s,r,h}) - T_\eta(y_{r,h})), -(\rho_{s,r,h} - \rho_{m,r,h}) \rangle \\ &= \langle T_\eta(y_{m,r,h}) - T_\eta(y_{r,h}), \rho_{m,r,h} - \rho_{s,r,h} \rangle + \langle T_\eta(y_{s,r,h}) - T_\eta(y_{r,h}), \rho_{s,r,h} - \rho_{m,r,h} \rangle. \end{aligned}$$



1152 Averaging with respect to  $s$  and  $m$

$$\begin{aligned}
& \frac{1}{M^2} \sum_{m=1}^M \sum_{s=1}^M \langle T_\eta(y_{m,r,h}) - T_\eta(y_{r,h}) + T_\eta(y_{r,h}) - T_\eta(y_{s,r,h}), \rho_{m,r,h} - \rho_{s,r,h} \rangle \\
&= \frac{1}{M^2} \sum_{m=1}^M \sum_{s=1}^M \langle T_\eta(y_{m,r,h}) - T_\eta(y_{r,h}), \rho_{m,r,h} - \rho_{s,r,h} \rangle \\
&\quad + \frac{1}{M^2} \sum_{m=1}^M \sum_{s=1}^M \langle T_\eta(y_{s,r,h}) - T_\eta(y_{r,h}), \rho_{s,r,h} - \rho_{m,r,h} \rangle \\
&= \frac{2}{M^2} \sum_{m=1}^M \sum_{s=1}^M \langle T_\eta(y_{m,r,h}) - T_\eta(y_{r,h}), \rho_{m,r,h} - \rho_{s,r,h} \rangle. \tag{38}
\end{aligned}$$

1153 Averaging Equation (37) with respect to  $m$  and  $s$  and using Equation (38) we get

$$\begin{aligned}
\frac{1}{M^2} \sum_{m=1}^M \sum_{s=1}^M \|y_{m,r,h+1} - y_{s,r,h+1}\|^2 &\leq \frac{1}{M^2} \sum_{m=1}^M \sum_{s=1}^M \|y_{m,r,h} - y_{s,r,h}\|^2 + \frac{4\eta^2}{M} \sum_{m=1}^M \|\rho_{m,r,h}\|^2 \\
&\quad - \frac{2\eta}{M^2} \sum_{m=1}^M \sum_{s=1}^M \langle T_\eta(y_{m,r,h}) - T_\eta(y_{r,h}), \rho_{m,r,h} - \rho_{s,r,h} \rangle.
\end{aligned}$$

1154 Using  $\Lambda_{r,h}$  as defined in Equation (35) we obtain the recursion

$$\Lambda_{r,h+1} \leq \Lambda_{r,h} + \frac{4\eta^2}{M} \sum_{m=1}^M \|\rho_{m,r,h}\|^2 - \frac{2\eta}{M^2} \sum_{m=1}^M \sum_{s=1}^M \langle T_\eta(y_{m,r,h}) - T_\eta(y_{r,h}), \rho_{m,r,h} - \rho_{s,r,h} \rangle.$$

1155 Now observe that  $\|\rho_{m,r,h}\|^2 \leq \sigma^2$  by assumption, therefore

$$\Lambda_{r,h+1} \leq \Lambda_{r,h} + 4\eta^2 \sigma^2 - \frac{2\eta}{M^2} \sum_{m=1}^M \sum_{s=1}^M \langle T_\eta(y_{m,r,h}) - T_\eta(y_{r,h}), \rho_{m,r,h} - \rho_{s,r,h} \rangle.$$

1156 Recursing the above inequality we get

$$\begin{aligned}
\Lambda_{r,h} &\leq \Lambda_{r,0} + 4\eta^2 \sigma^2 h - \frac{2\eta}{M^2} \sum_{k=0}^{h-1} \sum_{m=1}^M \sum_{s=1}^M \langle T_\eta(y_{m,r,k}) - T_\eta(y_{r,k}), \rho_{m,r,k} - \rho_{s,r,k} \rangle \\
&= 4\eta^2 \sigma^2 h - \frac{2\eta}{M^2} \sum_{k=0}^{h-1} \sum_{m=1}^M \sum_{s=1}^M \langle T_\eta(y_{m,r,k}) - T_\eta(y_{r,k}), \rho_{m,r,k} - \rho_{s,r,k} \rangle, \tag{39}
\end{aligned}$$

1157 where we used the fact that since  $y_{m,r,0} = y_{s,r,0} = x_r$  for all  $m, s$  then  $\Lambda_{r,0} = 0$ . Define

$$\mu_{r,h} = \frac{1}{M} \sum_{m=1}^M \|y_{m,r,h} - y_{r,h}\|, \quad \bar{\mu}_{r,h} = \max_{k \leq h} \mu_{r,k}, \tag{40}$$

$$X_{r,h} = \frac{1}{\bar{\mu}_{r,h}} \frac{1}{M^2} \sum_{m=1}^M \sum_{s=1}^M \langle T_\eta(y_{m,r,h}) - T_\eta(y_{r,h}), \rho_{m,r,h} - \rho_{s,r,h} \rangle. \tag{41}$$

1158 Let  $\mathbb{E}_{r,h}[\cdot]$  denote the expectation conditional on all information up to and including round  $r$  and  
1159 local step  $h$ . Then,

$$\mathbb{E}_{r,h}[X_{r,h}] = 0.$$

1160 Furthermore, we have by the triangle inequality, then our assumption on the noise followed by  
1161 Lemma B.1 that almost surely

$$\begin{aligned}
|\langle T_\eta(y_{m,r,h}) - T_\eta(y_{r,h}), \rho_{m,r,h} - \rho_{s,r,h} \rangle| &\leq \|T_\eta(y_{m,r,h}) - T_\eta(y_{r,h})\| \|\rho_{m,r,h} - \rho_{s,r,h}\| \\
&\leq \|T_\eta(y_{m,r,h}) - T_\eta(y_{r,h})\| (\|\rho_{m,r,h}\| + \|\rho_{s,r,h}\|) \\
&\leq 2\sigma \|T_\eta(y_{m,r,h}) - T_\eta(y_{r,h})\| \\
&\leq 2\sigma \|y_{m,r,h} - y_{r,h}\|. \tag{42}
\end{aligned}$$

1162 By the definition of  $X_{r,h}$  (Equation (41)), the triangle inequality, Equation (42), and the definition of  
 1163  $\bar{\mu}_{r,h}$  (Equation (40)) we have almost surely

$$\begin{aligned}
 |X_{r,h}| &= \frac{1}{\bar{\mu}_{r,h}} \left| \frac{1}{M^2} \sum_{m=1}^M \sum_{s=1}^M \langle T_\eta(y_{m,r,h}) - T_\eta(y_{r,h}), \rho_{m,r,h} - \rho_{s,r,h} \rangle \right| \\
 &\leq \frac{1}{\bar{\mu}_{r,h}} \frac{1}{M^2} \sum_{m=1}^M \sum_{s=1}^M |\langle T_\eta(y_{m,r,h}) - T_\eta(y_{r,h}), \rho_{m,r,h} - \rho_{s,r,h} \rangle| \\
 &\leq \frac{2\sigma}{\bar{\mu}_{r,h}} \frac{1}{M^2} \sum_{m=1}^M \sum_{s=1}^M \|y_{m,r,h} - y_{r,h}\| \\
 &= 2\sigma \frac{\frac{1}{M} \sum_{m=1}^M \|y_{m,r,h} - y_{r,h}\|}{\bar{\mu}_{r,h}} \\
 &\leq 2\sigma.
 \end{aligned}$$

1164 Then by Lemma B.4 with  $y_h = \bar{\mu}_{r,h}$  we have with probability at least  $1 - \delta$

$$\begin{aligned}
 \left| \sum_{k=0}^{h-1} \bar{\mu}_{r,k} X_{r,k} \right| &\leq 8\bar{\mu}_{r,h-1} \sqrt{\theta_{h-1,\delta} \sum_{k=0}^{h-1} X_{r,k}^2 + 4\sigma^2 \theta_{h,\delta}^2} \\
 &\leq 8\bar{\mu}_{r,h-1} \sqrt{\theta_{h-1,\delta} 4h\sigma^2 + 4\sigma^2 \theta_{h,\delta}^2} \\
 &\leq 16\bar{\mu}_{r,h-1} \theta_{h-1,\delta} \sigma \sqrt{h+1}.
 \end{aligned} \tag{43}$$

1165 Observe that

$$\sum_{k=0}^{h-1} \bar{\mu}_{r,k} X_{r,k} = \frac{1}{M^2} \sum_{k=0}^{h-1} \sum_{m=1}^M \sum_{s=1}^M \langle T_\eta(y_{m,r,k}) - T_\eta(y_{r,k}), \rho_{m,r,k} - \rho_{s,r,k} \rangle.$$

1166 Using this and Equation (43) to upper bound the right hand side of Equation (39) we obtain

$$\begin{aligned}
 \Lambda_{r,h} &\leq 4\eta^2 \sigma^2 h + 32\eta \bar{\mu}_{r,h-1} \theta_{h-1,\delta} \sigma \sqrt{h+1} \\
 &\leq 4\eta^2 \sigma^2 h + 2\alpha (32\eta \theta_{h-1,\delta} \sigma \sqrt{h+1})^2 + \frac{\bar{\mu}_{r,h-1}^2}{2\alpha} \\
 &= \eta^2 \sigma^2 (h+1) \theta_{h-1,\delta}^2 (4 + 2048\alpha) + \frac{\bar{\mu}_{r,h-1}^2}{2\alpha},
 \end{aligned} \tag{44}$$

1167 where we used that  $2ab \leq \alpha a^2 + \frac{1}{\alpha} b^2$  in the second step. Let  $\bar{\Lambda}_{r,h} = \max_{k \leq h} \Lambda_{r,k}$ . Observe that the  
 1168 right hand side of Equation (44) is increasing in  $h$ , therefore

$$\bar{\Lambda}_{r,h} \leq \eta^2 \sigma^2 (h+1) \theta_{h-1,\delta}^2 (4 + 2048\alpha) + \frac{\bar{\mu}_{r,h-1}^2}{2\alpha}. \tag{45}$$

1169 Observe that by the triangle inequality followed by Lemma B.2

$$\begin{aligned}
 \mu_{r,h} &= \frac{1}{M} \sum_{m=1}^M \|y_{m,r,h} - y_{r,h}\| \\
 &\leq \frac{1}{M^2} \sum_{m=1}^M \sum_{s=1}^M \|y_{m,r,h} - y_{s,r,h}\| \\
 &\leq \sqrt{\frac{1}{M^2} \sum_{m=1}^M \sum_{s=1}^M \|y_{m,r,h} - y_{s,r,h}\|^2} \\
 &= \sqrt{\Lambda_{r,h}}.
 \end{aligned}$$

1170 It follows that  $\bar{\mu}_{r,h} \leq \sqrt{\bar{\Lambda}_{r,h}}$ . Using this in Equation (45) we get

$$\begin{aligned}\bar{\Lambda}_{r,h} &\leq \eta^2 \sigma^2 (h+1) \theta_{h-1,\delta}^2 (4 + 2048\alpha) + \frac{\bar{\Lambda}_{r,h-1}}{2\alpha} \\ &\leq \eta^2 \sigma^2 (h+1) \theta_{h-1,\delta}^2 (4 + 2048\alpha) + \frac{\bar{\Lambda}_{r,h}}{2\alpha}.\end{aligned}$$

1171 Rearranging we get

$$\left(1 - \frac{1}{2\alpha}\right) \bar{\Lambda}_{r,h} \leq \eta^2 \sigma^2 (h+1) \theta_{h-1,\delta}^2 (4 + 2048\alpha)$$

1172 Put  $\alpha = 1$ , then

$$\bar{\Lambda}_{r,h} \leq 4104 \eta^2 \sigma^2 (h+1) \theta_{h-1,\delta}^2. \quad (46)$$

1173 Now that we have our bound on  $\bar{\Lambda}_{r,h}$ , we can use it to bound  $V_{r,h}$  as follows

$$V_{r,h} = \frac{1}{M} \sum_{m=1}^M \|y_{m,r,h} - y_{r,h}\|^2. \quad (47)$$

1174 Observe that by Jensen's inequality

$$\begin{aligned}\|y_{m,r,h} - y_{r,h}\|^2 &= \left\| y_{m,r,h} - \frac{1}{M} \sum_{s=1}^M y_{s,r,h} \right\|^2 \\ &= \left\| \frac{1}{M} (y_{m,r,h} - y_{s,r,h}) \right\|^2 \\ &\leq \frac{1}{M} \sum_{s=1}^M \|y_{m,r,h} - y_{s,r,h}\|^2.\end{aligned} \quad (48)$$

1175 Combining Equations (47) and (48) we have

$$V_{r,h} \leq \frac{1}{M^2} \sum_{m=1}^M \sum_{s=1}^M \|y_{m,r,h} - y_{s,r,h}\|^2 = \Lambda_{r,h}.$$

1176 Combining this with Equation (46) yields the lemma's statement.  $\square$

1177 **Lemma B.10.** (Per-round regret). In Algorithm 1, the iterates in a single communication round  
1178 satisfy

$$\begin{aligned}\|x_{r+1} - x_*\|^2 &\leq \|x_r - x_*\|^2 + \gamma^2 \eta^2 \sum_{h=0}^{H-1} \|g_{r,h}\|^2 + 2\gamma\eta |1 - \gamma| \zeta_2 \sum_{h=0}^{H-1} \|g_{r,h}\| \\ &\quad + \frac{\gamma\zeta_3 H}{\alpha} + \frac{\alpha\gamma\eta^2}{2} \frac{1}{M} \sum_{m=1}^M \sum_{h=0}^{H-1} \|g_{m,r,h}\|^2 - \frac{2\gamma\eta}{M} \sum_{h=0}^{H-1} \sum_{m=1}^M \langle y_{m,r,h} - x_*, g_{m,r,h} \rangle,\end{aligned}$$

1179 where  $\alpha > 0$  is arbitrary and

$$\zeta_2 = \max_h \|y_{r,h} - y_{r,0}\|, \quad \zeta_3 = \max_h \frac{1}{M} \sum_{m=1}^M \|y_{m,r,h} - y_{r,h}\|^2.$$

1180 *Proof.* Define the virtual sequences

$$g_{r,h} = \frac{1}{M} \sum_{m=1}^M g_{m,r,h}, \quad x_{r,0} = x_r, \quad x_{r,h+1} = x_{r,h} - \gamma\eta g_{r,h}.$$

1181 We have

$$\|x_{r,h+1} - x_*\|^2 = \|x_{r,h} - x_*\|^2 + \gamma^2 \eta^2 \|g_{r,h}\|^2 - 2\gamma\eta \langle x_{r,h} - x_*, g_{r,h} \rangle \quad (49)$$

1182 The inner product term can be decomposed as

$$-\langle x_{r,h} - x_*, g_{r,h} \rangle = -\langle x_{r,h} - y_{r,h}, g_{r,h} \rangle - \langle y_{r,h} - x_*, g_{r,h} \rangle. \quad (50)$$

1183 Observe that  $x_{r,h} = x_r - \gamma\eta \sum_{s=0}^{h-1} g_{r,s}$  and  $y_{r,h} = x_r - \eta \sum_{s=0}^{h-1} g_{r,s}$ . Therefore,

$$\begin{aligned} \|x_{r,h} - y_{r,h}\| &= \left\| (\gamma - 1)\eta \sum_{s=0}^{h-1} g_{r,s} \right\| \\ &= |\gamma - 1| \|y_{r,h} - y_{r,0}\| \\ &\leq |\gamma - 1| \zeta_2, \end{aligned}$$

1184 where  $\zeta_2 = \max_h \|y_{r,h} - y_{r,0}\|$ . Using this in Equation (50)

$$-\langle x_{r,h} - y_{r,h}, g_{r,h} \rangle \leq \|x_{r,h} - y_{r,h}\| \|g_{r,h}\| \leq |1 - \gamma| \zeta_2 \|g_{r,h}\|. \quad (51)$$

1185 Plugging Equation (51) into Equation (50) we get

$$\begin{aligned} -\langle x_{r,h} - x_*, g_{r,h} \rangle &\leq |1 - \gamma| \zeta_2 \|g_{r,h}\| - \langle y_{r,h} - x_*, g_{r,h} \rangle \\ &= |1 - \gamma| \zeta_2 \|g_{r,h}\| - \frac{1}{M} \sum_{m=1}^M \langle y_{r,h} - x_*, g_{m,r,h} \rangle \\ &= |1 - \gamma| \zeta_2 \|g_{r,h}\| - \frac{1}{M} \sum_{m=1}^M \langle y_{r,h} - y_{m,r,h}, g_{m,r,h} \rangle - \frac{1}{M} \sum_{m=1}^M \langle y_{m,r,h} - x_*, g_{m,r,h} \rangle. \quad (52) \end{aligned}$$

1186 For the second term in Equation (52) we have

$$\begin{aligned} -\frac{1}{M} \sum_{m=1}^M \langle y_{r,h} - y_{m,r,h}, g_{m,r,h} \rangle &\leq \frac{1}{M} \sum_{m=1}^M \|y_{r,h} - y_{m,r,h}\| \|g_{m,r,h}\| \\ &\leq \frac{1}{M} \sum_{m=1}^M \left[ \frac{\|y_{r,h} - y_{m,r,h}\|^2}{2\alpha\eta} + \frac{\alpha\eta}{2} \|g_{m,r,h}\|^2 \right] \\ &\leq \frac{\zeta_3}{2\alpha\eta} + \frac{\alpha\eta}{2} \frac{1}{M} \sum_{m=1}^M \|g_{m,r,h}\|^2. \quad (53) \end{aligned}$$

1187 Plugging Equation (53) into Equation (52) we get

$$\begin{aligned} -\langle x_{r,h} - x_*, g_{r,h} \rangle &\leq |1 - \gamma| \zeta_2 \|g_{r,h}\| + \frac{\zeta_3}{2\alpha\eta} + \frac{\alpha\eta}{2} \frac{1}{M} \sum_{m=1}^M \|g_{m,r,h}\|^2 \\ &\quad - \frac{1}{M} \sum_{m=1}^M \langle y_{m,r,h} - x_*, g_{m,r,h} \rangle. \quad (54) \end{aligned}$$

1188 Plug Equation (54) back into Equation (49) to get

$$\begin{aligned} \|x_{r,h+1} - x_*\|^2 &\leq \|x_{r,h} - x_*\|^2 + \gamma^2 \eta^2 \|g_{r,h}\|^2 + 2\gamma\eta |1 - \gamma| \zeta_2 \|g_{r,h}\| \\ &\quad + \frac{\gamma\zeta_3}{\alpha} + \frac{\alpha\gamma\eta^2}{M} \sum_{m=1}^M \|g_{m,r,h}\|^2 - \frac{2\gamma\eta}{M} \sum_{m=1}^M \langle y_{m,r,h} - x_*, g_{m,r,h} \rangle. \end{aligned}$$

1189 Recursing we get

$$\begin{aligned} \|x_{r+1} - x_*\|^2 &\leq \|x_r - x_*\|^2 + \gamma^2 \eta^2 \sum_{h=0}^{H-1} \|g_{r,h}\|^2 + 2\gamma\eta |1 - \gamma| \zeta_2 \sum_{h=0}^{H-1} \|g_{r,h}\| \\ &\quad + \frac{\gamma\zeta_3 H}{\alpha} + \frac{\alpha\gamma\eta^2}{2} \frac{1}{M} \sum_{m=1}^M \sum_{h=0}^{H-1} \|g_{m,r,h}\|^2 - \frac{2\gamma\eta}{M} \sum_{h=0}^{H-1} \sum_{m=1}^M \langle y_{m,r,h} - x_*, g_{m,r,h} \rangle. \end{aligned}$$

1190 □

1191 *Proof of Theorem 3.6.* Starting with the per-round recursion lemma, we have

$$\begin{aligned} \|x_{r+1} - x_*\|^2 &\leq \|x_r - x_*\|^2 + \gamma^2 \eta^2 \sum_{h=0}^{H-1} \|g_{r,h}\|^2 + 2\gamma |1 - \gamma| \zeta_2 \sum_{h=0}^{H-1} \|g_{r,h}\| \\ &\quad + \frac{\gamma \zeta_3 H}{\alpha} + \frac{\alpha \gamma \eta^2}{2} \frac{1}{M} \sum_{m=1}^M \sum_{h=0}^{H-1} \|g_{m,r,h}\|^2 - \frac{2\gamma \eta}{M} \sum_{h=0}^{H-1} \sum_{m=1}^M \langle y_{m,r,h} - x_*, g_{m,r,h} \rangle. \end{aligned}$$

1192 Observe that

$$\begin{aligned} \|y_{r,h} - y_{r,0}\| &= \eta \left\| \sum_{k=0}^{h-1} g_{r,k} \right\| \\ &\leq \eta \sum_{k=0}^{h-1} \|g_{r,k}\| \\ &\leq \eta \sum_{k=0}^{H-1} \|g_{r,k}\|. \end{aligned} \tag{55}$$

1193 Since this holds for any  $h$ , we have that  $\zeta_2 \leq \eta \sum_{k=0}^{H-1} \|g_{r,k}\|$ , where  $\zeta_2$  is defined in Lemma B.10.  
 1194 Moreover, by Lemma B.9 we have that with probability  $1 - \delta$  and an application of the union bound  
 1195 that for all  $r, h$

$$\frac{1}{M} \sum_{m=1}^M \|y_{m,r,h} - y_{r,h}\|^2 \leq 4104\iota \eta^2 \sigma^2 H, \tag{56}$$

1196 where  $\iota = 2 \cdot \log \frac{60 \log 6RH}{\delta}$  and we used that  $H + 1 \leq 2H$ . Since this bound holds for all  $h$ , we have

$$\zeta_3 = \max_h \frac{1}{M} \sum_{m=1}^M \|y_{m,r,h} - y_{r,h}\|^2 \leq 4104\iota \eta^2 \sigma^2 H.$$

1197 Therefore by Equation (55) and Lemma B.9

$$\begin{aligned} \|x_{r+1} - x_*\|^2 &\leq \|x_r - x_*\|^2 + \gamma^2 \eta^2 \sum_{h=0}^{H-1} \|g_{r,h}\|^2 + 2\gamma |1 - \gamma| \eta^2 \left( \sum_{h=0}^{H-1} \|g_{r,h}\| \right)^2 \\ &\quad + \frac{4104\gamma \eta^2 \sigma^2 H^2}{\alpha} \iota + \frac{\alpha \gamma \eta^2}{2} \frac{1}{M} \sum_{m=1}^M \sum_{h=0}^{H-1} \|g_{m,r,h}\|^2 - \frac{2\gamma \eta}{M} \sum_{h=0}^{H-1} \sum_{m=1}^M \langle y_{m,r,h} - x_*, g_{m,r,h} \rangle. \end{aligned}$$

1198 Let  $\xi_{m,r,h} = g_{m,r,h} - \nabla f(y_{m,r,h})$ . Then,

$$\begin{aligned} \|x_{r+1} - x_*\|^2 &\leq \|x_r - x_*\|^2 + \gamma^2 \eta^2 \sum_{h=0}^{H-1} \|g_{r,h}\|^2 + 2\gamma |1 - \gamma| \eta^2 \left( \sum_{h=0}^{H-1} \|g_{r,h}\| \right)^2 + \frac{4104\gamma \eta^2 \sigma^2 H^2}{\alpha} \iota \\ &\quad + \frac{\alpha \gamma \eta^2}{2} \frac{1}{M} \sum_{m=1}^M \sum_{h=0}^{H-1} \|g_{m,r,h}\|^2 - \frac{2\gamma \eta}{M} \sum_{h=0}^{H-1} \sum_{m=1}^M \langle y_{m,r,h} - x_*, \nabla f(y_{m,r,h}) \rangle \\ &\quad - \frac{2\gamma \eta}{M} \sum_{h=0}^{H-1} \sum_{m=1}^M \langle y_{m,r,h} - x_*, \xi_{m,r,h} \rangle, \end{aligned} \tag{57}$$

1199 where  $\xi_{m,r,h} = g_{m,r,h} - \nabla f(y_{m,r,h})$ . Define

$$\nu_{r,h} = \frac{1}{M} \sum_{m=1}^M \|y_{m,r,h} - x_*\|, \quad \bar{\nu}_{r,h} = \max_{p \leq r, s \leq h} \nu_{p,s}.$$

1200 Let

$$X_{r,h} = \frac{1}{\bar{\nu}_{r,h}} \frac{1}{M} \sum_{m=1}^M \langle y_{m,r,h} - x_*, \xi_{m,r,h} \rangle$$

1201 Let  $\mathcal{F}_{r,h-1}$  denote the sigma algebra generated by all randomness up to and including step  $r, h-1$ .  
 1202 Note that

$$\begin{aligned} \mathbb{E}_{\mathcal{F}_{r,h-1}} [X_{r,h}] &= \frac{1}{\bar{\nu}_{r,h}} \frac{1}{M} \sum_{m=1}^M \mathbb{E}_{\mathcal{F}_{r,h}} [\langle y_{m,r,h} - x_*, \xi_{m,r,h} \rangle] \\ &= \frac{1}{\bar{\nu}_{r,h}} \frac{1}{M} \sum_{m=1}^M \langle y_{m,r,h} - x_*, \mathbb{E}_{\mathcal{F}_{r,h}} [\xi_{m,r,h}] \rangle \\ &= 0, \end{aligned}$$

1203 where we used that  $\nu_{r,h}$  and  $y_{m,r,h}$  are both  $\mathcal{F}_{r,h-1}$ -measurable and that the noise has mean zero.  
 1204 The edge cases  $X_{r,0}$  are handled similarly. Moreover, using the assumption that  $\|\xi_{m,r,h}\| \leq \sigma$  almost  
 1205 surely and the definition of  $\bar{\nu}_{r,h}$ ,

$$\begin{aligned} \|X_{r,h}\| &= \left\| \frac{1}{\bar{\nu}_{r,h}} \frac{1}{M} \sum_{m=1}^M \langle y_{m,r,h} - x_*, \xi_{m,r,h} \rangle \right\| \\ &\leq \frac{1}{M} \sum_{m=1}^M \frac{\|y_{m,r,h} - x_*\| \|\xi_{m,r,h}\|}{\bar{\nu}_{r,h}} \\ &\leq \frac{1}{M} \sum_{m=1}^M (1 \cdot \sigma) \\ &= \sigma. \end{aligned}$$

1206 Applying Lemma B.4 on  $X_{r,h}$  with  $y_{r,h} = \bar{\nu}_{r,h}$ ,  $C_{r,h} = \sigma$ ,  $\hat{X}_{r,h} = 0$  we have

$$\left| \frac{1}{M} \sum_{r=0}^{R-1} \sum_{h=0}^{H-1} \sum_{m=1}^M \langle y_{m,r,h} - x_*, \xi_{m,r,h} \rangle \right| \leq 16\bar{\nu}_{R,H} \iota \sigma \sqrt{RH}, \quad (58)$$

1207 where  $\iota$  is defined as before. Using Equation (58) in Equation (57)

$$\begin{aligned} \frac{2\gamma\eta}{M} \sum_{m,r,h} \langle y_{m,r,h} - x_*, \nabla f(y_{m,r,h}) \rangle &\leq \|x_0 - x_*\|^2 - \|x_R - x_*\|^2 + \gamma^2 \eta^2 \sum_{r,h} \|g_{r,h}\|^2 \\ &\quad + 2\gamma |1 - \gamma| \eta^2 \sum_{r=0}^{R-1} \left( \sum_{h=0}^{H-1} \|g_{r,h}\| \right)^2 + R \cdot \frac{4104\gamma\eta^2\sigma^2 H^2}{\alpha} \iota \\ &\quad + \frac{\alpha\gamma\eta^2}{2} \frac{1}{M} \sum_{m,r,h} \|g_{m,r,h}\|^2 + 2\gamma\eta \left[ 16\bar{\nu}_{R,H} \iota \sigma \sqrt{RH} \right]. \end{aligned} \quad (59)$$

1208 Let

$$\begin{aligned} \Omega &= \gamma^2 \eta^2 \sum_{r,h} \|g_{r,h}\|^2 + 2\gamma |1 - \gamma| \eta^2 \sum_{r=0}^{R-1} \left( \sum_{h=0}^{H-1} \|g_{r,h}\| \right)^2 + R \cdot \frac{4104\gamma\eta^2\sigma^2 H^2}{\alpha} \iota \\ &\quad + \frac{\alpha\gamma\eta^2}{2} \frac{1}{M} \sum_{m,r,h} \|g_{m,r,h}\|^2 \end{aligned} \quad (60)$$

1209 Then by convexity and Equation (59) we get

$$\begin{aligned} \|x_R - x_*\|^2 &\leq \|x_0 - x_*\|^2 + \Omega + 2\gamma\eta \left[ 16\bar{\nu}_{R,H} \iota \sigma \sqrt{RH} \right] - \frac{2\gamma\eta}{M} \sum_{m,r,h} \langle y_{m,r,h} - x_*, \nabla f(y_{m,r,h}) \rangle \\ &\leq \|x_0 - x_*\|^2 + \Omega + 2\gamma\eta \left[ 16\bar{\nu}_{R,H} \iota \sigma \sqrt{RH} \right], \end{aligned} \quad (61)$$

1210 where in the second line we used that  $x_*$  is the minimizer of  $f$  and therefore  
 1211  $\langle y_{m,r,h} - x_*, \nabla f(y_{m,r,h}) \rangle \geq 0$  by convexity. It is not difficult to see that this guarantee in fact  
 1212 applies not just on  $\|x_R - x_*\|^2$  but on any  $x_r$ . Let  $d_r = \|x_r - x_*\|$  and  $\bar{d}_r = \max_{r' \leq r} d_{r'}$ . Observe

$$\begin{aligned}
 \nu_{r,h} &= \frac{1}{M} \sum_{m=1}^M \|y_{m,r,h} - x_*\| \leq \frac{1}{M} \sum_{m=1}^M [\|y_{m,r,h} - y_{m,r,0}\| + \|x_r - x_*\|] \\
 &\leq \left[ \frac{\eta}{M} \sum_{m=1}^M \sum_{k=0}^{h-1} \|g_{m,r,k}\| \right] + \|x_r - x_*\| \\
 &\leq \left[ \frac{\eta}{M} \sum_{m=1}^M \sum_{k=0}^{H-1} \|g_{m,r,k}\| \right] + \|x_r - x_*\|. \tag{62}
 \end{aligned}$$

1213 Using Equation (62) in Equation (61) we get

$$\begin{aligned}
 \bar{d}_R^2 &\leq d_0^2 + \Omega + 32\gamma\eta\iota\sigma\sqrt{RH}\bar{\nu}_{R,H} \\
 &\leq d_0^2 + \Omega + 32\gamma\eta\iota\sigma\sqrt{RH} \left[ \frac{\eta}{M} \sum_{m,h} \|g_{m,r,h}\| \right] + 32\gamma\eta\iota\sigma\sqrt{RH}\bar{d}_R \\
 &\leq d_0^2 + \Omega + 2 \left( 32\gamma\eta\iota\sigma\sqrt{RH} \right)^2 + \eta^2 \left( \frac{1}{M} \sum_{m,h} \|g_{m,r,h}\| \right)^2 + \frac{\bar{d}_R^2}{2}.
 \end{aligned}$$

1214 Therefore

$$\bar{d}_R^2 \leq 2d_0^2 + 2\Omega + 4096\gamma^2\eta^2\iota^2\sigma^2RH + 2\eta^2 \left( \frac{1}{M} \max_r \sum_{m,h} \|g_{m,r,h}\| \right)^2. \tag{63}$$

1215 By the triangle inequality applied twice and the definition of  $\bar{d}_R$ ,

$$\begin{aligned}
 \|y_{m,r,s} - x_*\| &\leq \|y_{m,r,0} - y_{m,r,s}\| + \|y_{m,r,0} - x_*\| \\
 &= \eta \left\| \sum_{h=0}^{s-1} g_{m,r,h} \right\| + \|y_{m,r,0} - x_*\| \\
 &\leq \eta \sum_{h=0}^{s-1} \|g_{m,r,h}\| + \|y_{m,r,0} - x_*\| \\
 &\leq \eta \sum_{h=0}^{s-1} \|g_{m,r,h}\| + \bar{d}_R \\
 &\leq \eta \sum_{h=0}^{H-1} \|g_{m,r,h}\| + \bar{d}_R.
 \end{aligned}$$

1216 Therefore

$$\frac{1}{M} \sum_{m=1}^M \|y_{m,r,s} - x_*\| \leq \eta \left( \frac{1}{M} \sum_{m=1}^M \sum_{h=0}^{H-1} \|g_{m,r,h}\| \right) + \bar{d}_R$$



1217 We now use the inequality  $(a + b)^2 \leq 2a^2 + 2b^2$  to get

$$\begin{aligned}\nu_{r,s}^2 &= \left( \frac{1}{M} \sum_{m=1}^M \|y_{m,r,s} - x_*\| \right)^2 \\ &\leq 2 \left( \eta \left( \frac{1}{M} \sum_{m=1}^M \sum_{h=0}^{H-1} \|g_{m,r,h}\| \right) \right)^2 + 2\bar{d}_R^2 \\ &= 2\eta^2 \left( \frac{1}{M} \sum_{m,h} \|g_{m,r,h}\| \right)^2 + 2\bar{d}_R^2.\end{aligned}$$

1218 Finally, using our bound on  $\bar{d}_R^2$  given by equation (63)

$$\nu_{r,s}^2 \leq 4d_0^2 + 4\Omega + 8192\gamma^2\eta^2\iota^2\sigma^2RH + 6\eta^2 \left( \frac{1}{M} \sum_{m,h} \|g_{m,r,h}\| \right)^2,$$

1219 Therefore

$$\begin{aligned}\bar{\nu}_{R,H}^2 &= \max_{r,s} \nu_{r,s}^2 \\ &\leq 4d_0^2 + 4\Omega + 8192\gamma^2\eta^2\iota^2\sigma^2RH + 6\eta^2 \left( \frac{1}{M} \max_r \sum_{m,h} \|g_{m,r,h}\| \right)^2.\end{aligned}$$

1220 By Equations (59) and (60) and the last equation,

$$\begin{aligned}\frac{2\gamma\eta}{M} \sum_{m,r,h} \langle y_{m,r,h} - x_*, \nabla f(y_{m,r,h}) \rangle &\leq \|x_0 - x_*\|^2 - \|x_R - x_*\|^2 + \Omega + 2\gamma\eta \left[ 16\bar{\nu}_{R,H}\iota\sigma\sqrt{RH} \right] \\ &\leq d_0^2 - d_R^2 + \Omega + \frac{(32\gamma\eta\iota\sigma\sqrt{RH})^2}{2} + 4 \left[ d_0^2 + \Omega + 2048\gamma^2\eta^2\iota^2\sigma^2RH \right] + 6\eta^2 R \left( \frac{1}{M} \max_r \sum_{m,h} \|g_{m,r,h}\| \right)^2 \\ &= d_0^2 - d_R^2 + \Omega + \frac{(32\gamma\eta\iota\sigma\sqrt{RH})^2}{2} + 4 \left[ d_0^2 + \Omega + 2048\gamma^2\eta^2\iota^2\sigma^2RH \right] + 6\eta^2 R \left( \frac{1}{M} \max_r \sum_{m,h} \|g_{m,r,h}\| \right)^2 \\ &\leq d_0^2 - d_R^2 + 6\Omega + 8704\gamma^2\eta^2\iota^2\sigma^2RH + 4d_0^2 + 6\eta^2 R \left( \frac{1}{M} \max_r \sum_{m,h} \|g_{m,r,h}\| \right)^2. \quad (64)\end{aligned}$$

1221 Dropping the  $-d_R^2$  term, we get

$$\begin{aligned}\frac{2\gamma\eta}{M} \sum_{m,r,h} \langle y_{m,r,h} - x_*, \nabla f(y_{m,r,h}) \rangle &\leq 5d_0^2 + 6\Omega + 8704\gamma^2\eta^2\iota^2\sigma^2RH + 6\eta^2 R \left( \frac{1}{M} \max_r \sum_{m,h} \|g_{m,r,h}\| \right)^2 \\ &\leq 5d_0^2 + 6\gamma^2\eta^2 \sum_{r,h} \|g_{r,h}\|^2 + 12\gamma|1 - \gamma|\eta^2 \sum_{r=0}^{R-1} \left( \sum_{h=0}^{H-1} \|g_{r,h}\| \right)^2 + RH \frac{24624\gamma\eta^2\sigma^2H\iota}{\alpha} \\ &\quad + \frac{3\alpha\gamma\eta^2}{M} \sum_{m,r,h} \|g_{m,r,h}\|^2 + 8704\gamma^2\eta^2\iota^2\sigma^2RH + 6\eta^2 R \left( \frac{1}{M} \max_r \sum_{m,h} \|g_{m,r,h}\| \right)^2.\end{aligned}$$

1222 Dividing both sides by  $2\gamma\eta RH$  gives

$$\begin{aligned}
\frac{1}{MRH} \sum_{m,r,h} \langle y_{m,r,h} - x_*, \nabla f(y_{m,r,h}) \rangle &\leq \frac{5d_0^2}{2\gamma\eta RH} + \frac{3\gamma\eta}{RH} \sum_{r,h} \|g_{r,h}\|^2 \\
&+ \frac{6|1-\gamma|\eta}{RH} \sum_{r=0}^{R-1} \left( \sum_{h=0}^{H-1} \|g_{r,h}\| \right)^2 + \frac{24624\eta\sigma^2 H\iota}{\alpha} \\
&+ \frac{3\alpha\eta}{MRH} \sum_{m,r,h} \|g_{m,r,h}\|^2 + 8704\gamma\eta\iota^2\sigma^2 + \frac{6\eta}{\gamma H} \left( \frac{1}{M} \max_r \sum_{m,h} \|g_{m,r,h}\| \right)^2.
\end{aligned} \tag{65}$$

1223 Observe that by optimizing over  $\alpha$  we have

$$\begin{aligned}
\frac{24624\eta\sigma^2 H\iota}{\alpha} + \frac{3\alpha\eta}{MRH} \sum_{m,r,h} \|g_{m,r,h}\|^2 &\leq 2 \sqrt{(24624\eta\sigma^2 H\iota) \left( \frac{3\eta}{MRH} \sum_{m,r,h} \|g_{m,r,h}\|^2 \right)} \\
&\leq 544\eta\sigma\iota \sqrt{\frac{1}{MR} \sum_{m,r,h} \|g_{m,r,h}\|^2}.
\end{aligned}$$

1224 Using this in Equation (65) followed by convexity completes the proof.  $\square$
